1 **Re-evaluating the actin-dependence of spectraplakins functions during axon growth and**  
2 **maintenance**

3

4

5 Yue Qu<sup>1,2</sup>, Juliana Alves-Silva<sup>1,3</sup>, Kriti Gupta<sup>4</sup>, Ines Hahn<sup>1</sup>, Jill Parkin<sup>1</sup>, Natalia Sánchez-Soriano<sup>4</sup>,  
6 Andreas Prokop<sup>1,#</sup>

7

8

9

- 10 1) The University of Manchester, Manchester Academic Health Science Centre, Faculty of Biology,  
11 Medicine and Health, School of Biology, Manchester, UK
- 12 2) current address: Division of Nutritional Sciences, College of Human Ecology, Cornell University,  
13 Ithaca, United States
- 14 3) current address: Departamento de Morfologia, Instituto de Ciências Biológicas, Universidade  
15 Federal de Minas Gerais. Belo Horizonte, Brazil
- 16 4) Department of Molecular Physiology & Cell Signalling, Institute of Systems, Molecular &  
17 Integrative Biology, University of Liverpool, Liverpool, United Kingdom

18

19

20

21 Running title: Actin dependency of spectraplakins

22 Key words: *Drosophila*, neurons, axons, microtubules, actin

23

24

25 # author for correspondence:  
26 The University of Manchester  
27 Faculty of Biology, Medicine and Health  
28 Manchester Academic Health Science Centre  
29 School of Biology  
30 Oxford Road  
31 Manchester M13 9PT  
32 Tel: +44-(0)161-27-51556  
33 Fax: +44-(0)161-27-51505  
34 [Andreas.Prokop@manchester.ac.uk](mailto:Andreas.Prokop@manchester.ac.uk)

35

36

37

## 38 Abstract

39 Axons are the long and slender processes of neurons constituting the biological cables that wire the  
40 nervous system. The growth and maintenance of axons require bundles of microtubules that extend  
41 through their entire length. Understanding microtubule regulation is therefore an essential aspect of  
42 axon biology. Key regulators of neuronal microtubules are the spectraplakins, a well-conserved  
43 family of cytoskeletal cross-linkers that underlie neuropathies in mouse and humans. Spectraplakins  
44 deficiency in mouse or *Drosophila* causes severe decay of microtubule bundles and axon growth  
45 inhibition. The underlying mechanisms are best understood for *Drosophila* Short stop (Shot) and  
46 believed to involve cytoskeletal cross-linkage: the N-terminal calponin homology (CH) domains bind  
47 to F-actin, and the C-terminus to microtubules and Eb1. Here we have gained new understanding  
48 by showing that the F-actin interaction must be finely balanced: altering the properties of F-actin  
49 networks or deleting/exchanging Shot's CH domains induces changes in Shot function - with a  
50 Lifeact-containing Shot variant causing remarkable remodelling of neuronal microtubules. In addition  
51 to actin-MT cross-linkage, we find strong indications that Shot executes redundant MT bundle-  
52 promoting roles that are F-actin-independent. We argue that these likely involve the neuronal Shot-  
53 PH isoform, which is characterised by a large, unexplored central plakin repeat region (PRR). Work  
54 on PRRs might therefore pave the way towards important new mechanisms of axon biology and  
55 architecture that might similarly apply to central PRRs in mammalian spectraplakins.

56

## 57 Introduction

58 Axons are the slender, up-to-two-meter-long processes of neurons that form the biological cables  
59 wiring our bodies (Prokop, 2020). Their *de novo* formation during development, regeneration or brain  
60 plasticity is implemented at growth cones (GCs), the amoeboid tips of extending axons (Harrison,  
61 1910; Ramón y Cajal, 1890). GCs navigate by sensing spatiotemporally patterned chemical and  
62 mechanical cues along their paths which are translated into orchestrated morphogenetic changes  
63 leading to axon extension (Franze et al., 2013; Sanes et al., 2019; Tessier-Lavigne and Goodman,  
64 1996).

65 These morphogenetic changes are mediated by the cytoskeleton, in particular, actin and  
66 microtubules (MTs; Dent et al., 2011; Lowery and van Vactor, 2009; Prokop et al., 2013; Tanaka and  
67 Sabry, 1995): F-actin in the GC periphery is required for explorative protrusive activity and mechano-  
68 sensing and will eventually mediate the directional stabilisation of MTs which will, in turn, implement  
69 the actual growth events (e.g. Buck and Zheng, 2002; Geraldo et al., 2008; Lee and Suter, 2008; Qu  
70 et al., 2019; Suter and Forscher, 2001). If MTs in GCs arrange into bundled loops or spools, they  
71 seem to suppress such interactions in the periphery and slow down axon growth (Dent et al., 1999).

72 The MTs of GCs originate from the MT bundles of the axon shaft. These bundles run all along axons  
73 and serve as the essential highways for axonal transport (Prokop, 2020). They must therefore be  
74 maintained throughout an organism's lifetime involving active repair and turn-over (Hahn et al., 2019;  
75 Prokop, 2021). These bundles can also drive axon elongation through so-called intercalative or  
76 stretch growth (Bray, 1984; Lamoureux et al., 2010; Smith, 2009; Zheng et al., 1991). For this, axons  
77 display forward drift of MT bundles (Miller and Sheetz, 2006; Roossien et al., 2013) or MT sliding  
78 forces (Lu et al., 2015; Winding et al., 2016). Like in GCs, the MT bundle regulation in axon shafts  
79 requires actin-MT interactions required for their parallel arrangement and to uphold MT numbers  
80 (Alves-Silva et al., 2012; Datar et al., 2019; Krieg et al., 2017; Qu et al., 2017).

81 Numerous mechanisms have been described that mediate actin-MT interaction (Dogterom and  
82 Koenderink, 2019; Kundu et al., 2021; Mohan and John, 2015). In axons, very prominent mediators

83 are the spectraplakins, an evolutionarily well-conserved family of multi-domain cytoskeletal linker  
84 proteins (Fig.1A; Voelzmann et al., 2017). Of these, dystonin was discovered in a mouse model of  
85 sensory neuropathy, later shown to involve severe MT bundle deterioration and be linked to human  
86 HSAN6 (hereditary sensory and autonomic neuropathy: OMIM #[614653](#); Duchen et al., 1964;  
87 Edvardson et al., 2012; Eyer et al., 1998). Its mammalian paralogue ACF7/MACF1 was discovered  
88 as an actin-MT cross-linker (Byers et al., 1995; Leung et al., 1999), later shown to be involved in  
89 neuronal development (Goryunov et al., 2010; Ka et al., 2014; Ka and Kim, 2015; Sánchez-Soriano  
90 et al., 2009) and linked to lissencephaly (OMIM #[618325](#)). As detailed elsewhere (Voelzmann et al.,  
91 2017), spectraplakins can act as actin-MT cross-linkers: they bind F-actin via a tandem of N-terminal  
92 calponin homology domains (CH domains) and associate with MTs through their C-terminus; this C-  
93 terminus harbours a GRD (Gas2-related domain) which also stabilises MTs against  
94 depolymerisation, and a positively charged unstructured Ctail which also binds to Eb1 (Fig.1A; Alves-  
95 Silva et al., 2012; Goriounov et al., 2003; Honnappa et al., 2009; Lee and Kolodziej, 2002).

96 The *Drosophila* spectraplakins Short stop (Shot) is a close orthologue of dystonin and ACF7/MACF1.  
97 In neurons, Shot is required for axon and dendrite growth, neuronal polarity, axonal  
98 compartmentalisation, synapse formation and axonal MT bundle maintenance (Lee et al., 2000;  
99 Prokop et al., 1998; Reuter et al., 2003). In Shot-deficient neurons, MT bundles in axon shafts and  
100 GCs frequently disintegrate into disorganised, curled, criss-crossing arrangements (from now on  
101 referred to as MT curling). This dramatic MT phenotype can be rescued when reinstating actin-MT  
102 cross-linking activity of Shot, through a mechanism where Shot guides the extension of polymerising  
103 MTs along the axonal cortex into parallel bundles (Alves-Silva et al., 2012; Hahn et al., 2021;  
104 Sánchez-Soriano et al., 2010). Whereas the necessary C-terminal interaction of Shot with MTs is  
105 quite well described, we have little knowledge of the N-terminal interaction with neuronal F-actin  
106 networks, especially when considering that these can be of very different nature: presenting as  
107 sparse cortical F-actin rings in the axon shaft (Letierrier et al., 2017) or dense F-actin networks in  
108 GCs (Dent et al., 2011).

109 Here, we have gained new understanding of Shot's F-actin interaction. Firstly, we show that Shot  
110 function does not simply depend on F-actin: it rather appears to involve a well-balanced interplay of  
111 low-affinity CH domains with F-actin networks, where any changes can trigger alterations in Shot's  
112 functional output; this phenomenon is relevant for axon growth-regulating MT spool formation in  
113 GCs. In the axon shaft, Shot acts as an F-actin/MT/Eb1 cross-linker in MT bundle maintenance. In  
114 addition, we provide strong indications that Shot performs actin-independent bundle-maintaining  
115 functions acting redundantly to F-actin/MT/Eb1 cross-linkage. We argue these functions to be  
116 mediated by the Shot-PH isoform characterised by an evolutionarily conserved plakin repeat region  
117 (PRR) that is functionally unexplored (Hahn et al., 2016; Röper and Brown, 2003; Voelzmann et al.,  
118 2017) and might therefore hold the key to uncharted mechanisms of axon biology and architecture.

119

## 120 **Results**

### 121 Roles of Shot's actin-binding domain in gain-of-function experiments

122 To assess F-actin dependency of Shot function, we first took a gain-of-function (GOF) approach. For  
123 this, we targeted the expression of transgenic Shot constructs to primary *Drosophila* neurons and  
124 analysed them at 6 hours *in vitro* (HIV) for two phenotypes: we quantified the length of axons and  
125 the number of neurons showing bundled loops referred to as 'spools' (Fig.1B',G',H') - as opposed to  
126 'pointed' (Fig.1C',D',I',J') or 'disorganised' (Fig.1F'; Sánchez-Soriano et al., 2010; Teng et al., 2001).  
127 Neuronal expression of Shot-PE::GFP (a GFP-tagged version of the best-studied Shot isoform; Hahn

128 et al., 2016; Fig.1A,B), caused a reduction in axon length to ~80% and doubled the number of MT  
129 spools in growth cones (GCs) when compared to wild-type controls (Figs.1B',L). In contrast, Shot-  
130 PC::GFP (another natural isoform which lacks CH1; Figs.1A,C), failed to induce either of these  
131 phenotypes; instead it showed a trend to suppress spool numbers below control levels (Figs.1C',L),  
132 as similarly observed in previous studies (Sánchez-Soriano et al., 2010). The finding suggests that  
133 an interaction with F-actin is essential for spool formation, since lack of CH1 in the Shot-PC isoform  
134 (Fig.1C) eliminates F-actin interaction (concluded from localisation and binding studies; Lee and  
135 Kolodziej, 2002). Accordingly, spool induction can also be suppressed when depleting F-actin with  
136 the drug latrunculin A (LatA; Fig.2B,D; Sánchez-Soriano et al., 2010).

137 Shot-PE and Shot-PC not only differ in the presence/absence of CH1, they also display different  
138 lead sequences that flank CH domains N-terminally (blue A\* vs. yellow C\* in Fig.1A-C; Hahn et al.,  
139 2016). Both lead sequences lack any informative homologies or motifs but may still be functionally  
140 relevant, for example by having different modifying impacts on CH domain functions (Yin et al., 2020).  
141 Therefore, we generated Shot-PE- $\Delta$ ABD::GFP, a Shot-PE variant containing the A\* lead sequence  
142 but lacking both CH domains (Fig.1D-F). The phenotypes observed upon Shot-PE- $\Delta$ ABD::GFP  
143 expression were almost identical to those of Shot-PC (Fig.1F',K,L), corroborating former claims that  
144 the actin-binding capability of Shot-PC is negligible (Lee and Kolodziej, 2002).

145 Surprising results were obtained when deleting single CH domains in the Shot-PE context. Previous  
146 work suggested that CH1 is the main actin-binding domain of the tandem (Korenbaum and Rivero,  
147 2002; Lee and Kolodziej, 2002; Sjöblom et al., 2008; Yin et al., 2020), and we expected therefore  
148 that Shot-PE- $\Delta$ CH2 would have modest actin-binding hence spool-inducing capability, whereas  
149 Shot-PE- $\Delta$ CH1 would be similar to Shot-PC or Shot- $\Delta$ ABD. However, we found the opposite: When  
150 deleting the functionally less prominent CH2, we found robust axon elongation to ~120% and failure  
151 to induce extra spools, i.e. a phenotype suggesting complete loss of actin-binding properties  
152 although CH1 was present (Fig.1E,K,L). In contrast, Shot-PE- $\Delta$ CH1 expression had a trend towards  
153 extra spool formation and shorter axons, suggesting modest actin-binding properties although CH1  
154 was absent. Shot-PE- $\Delta$ CH1 resembles Shot-PC in that it lacks the CH1 domain, but it contains the  
155 A\* lead sequence instead of C\* (Figs.1C vs. D). Our results might therefore hint at potential  
156 regulatory roles of the N-terminal lead sequences: for example, the C\* lead sequence of Shot-PC,  
157 but not the A\* sequence of Shot-PE, might inhibit residual actin affinities of CH2, thus explaining why  
158 Shot-RE- $\Delta$ CH1 appears to display more activity than Shot-RC and Shot-RE- $\Delta$ ABD.

159

#### 160 F-actin is required for Shot construct localisation

161 To gain more understanding of these phenotypes, we performed localisation studies. Shot-PE::GFP  
162 is strongly enriched at the distal end of axons, mostly at the actin-enriched growth cones (GCs); this  
163 is consistent with its spool-inducing activity (Fig.1B''). Also, Shot-PC::GFP and Shot-PE- $\Delta$ ABD::GFP  
164 are distally enriched in axons (Fig.1C'',F''), suggesting that their inability to induce spools is not due  
165 to their physical absence but rather their functional impairment.

166 Also Shot-PE- $\Delta$ CH1::GFP is enriched in distal axon segments (Fig.1D''). This localisation is  
167 consistent with its spool-inducing tendencies which might be mediated by residual F-actin affinity of  
168 its CH2 domain (see above). In contrast, the Shot-PE- $\Delta$ CH2::GFP construct is retained at or actively  
169 localises to proximal axon segments (Fig.1E'') which is consistent with the absence of its spool-  
170 inducing activity (Fig.1L).

171 It is surprising that even Shot constructs lacking their CH domains localise distally at F-actin-rich  
172 GCs, although this distal localisation was nevertheless F-actin-dependent: LatA treatment abolished

173 the distal accumulation of Shot-PE::GFP ('GFP' in Fig.2B) as was similarly observed with the F-actin-  
174 inhibiting drug cytochalasin D (CytoD; Fig.S1B).

175 C-terminal domains of Shot seem not to be involved since the GFP-tagged C-terminus (Shot-  
176 EGC::GFP; comprising EF-hand motifs and the MT-binding GDR and Ctail; Fig.1J) localises  
177 homogeneously along axonal MTs, and does not induce extra spools or axon shortening (Fig.1J-L;  
178 Alves-Silva et al., 2012). Instead, we focussed on the N-terminal plakin domain, because Shot-PE-  
179  $\Delta$ plakin::GFP had been reported to display transient localisation defects in developing embryonic  
180 motor nerves (Bottenberg et al., 2009). However, like most other constructs, Shot-PE- $\Delta$ plakin::GFP  
181 displayed distal localisation in primary neurons (Fig.1I"), but it failed to induce robust spool formation  
182 or axon shortening (Fig.1K,L; consistent with its partial deficits in supporting axon growth *in vivo*;  
183 Bottenberg et al., 2009).

184 Taken together, our data suggest complex regulations at the N-terminus. We propose that two  
185 domains can mediate F-actin association: CH domains through direct binding, and the plakin domain  
186 (which contains a SRC Homology 3 motif of protein interaction; 'SH3' in Fig.1A) through association  
187 with independent factors that are localised at GCs through F-actin (e.g. transmembrane proteins;  
188 see Discussion). In this scenario, distal localisation of Shot could be mediated by either the CH  
189 domains or the plakin domain alone, but its spool-inducing function would depend on both domains  
190 in parallel; this would explain why single deletion of either the plakin or the CH domains abolishes  
191 Shot's spool-inducing activity but not its localisation.

192

#### 193 Qualitative or quantitative changes of F-actin interaction influence Shot's MT-regulating roles

194 As explained above, we propose that Shot interacts with F-actin networks through both the plakin  
195 and CH domains. This raises the question of whether Shot uses F-actin as a mere anchor or whether  
196 its function is influenced by changes in the quantity and quality of F-actin networks. To address this,  
197 we first introduced quantitative and qualitative changes to F-actin networks by manipulating actin  
198 nucleation, i.e. the process of seeding new actin filaments.

199 In *Drosophila* primary neurons, nucleation is performed primarily by the formin DAAM and the Arp2/3  
200 complex (Gonçalves-Pimentel et al., 2011; Prokop et al., 2011); of these, Arp2/3 is expected to  
201 contribute branched networks that are qualitatively different from those nucleated by formins  
202 (Blanchoin et al., 2014). Arp2/3-mediated actin nucleation can be specifically inhibited by CK666  
203 (Hetrick et al., 2013). When applying 100 nM CK666 for 2 hrs, we observed a reduction in filopodia  
204 numbers to  $72\pm 5\%$  ( $P_{\text{Mann-Whitney}} < 0.001$ ,  $n=80$ ), indicating successful Arp2/3 inhibition and a reduction  
205 in F-actin abundance (Gonçalves-Pimentel et al., 2011). Under these conditions, Shot-PE::GFP was  
206 still recruited to the distal axon, but its spool-inducing activity was strongly suppressed (Fig.2C,D).  
207 This finding supports our hypothesis that quantitative and/or qualitative changes of F-actin networks  
208 impact MT regulatory roles of Shot.

209 To further challenge this notion, we decided to exchange the two CH domains of Shot for  
210 conceptually different actin-binding domains taken from other proteins. For this, we chose the 17  
211 residue actin-binding motif Lifeact (Life) from the *Saccharomyces cerevisiae* protein Abp140 (Riedl  
212 et al., 2008), and the C-ERMAD domain of Moesin (Moe; Kiehart et al., 2000; Millard and Martin,  
213 2008). When extrapolating from binding studies reported for CH domains of  $\alpha$ -actinin (closely related  
214 to those of Shot; Fig.S2), we expected that Shot's CH domains bind F-actin modestly, whereas Life  
215 should bind F-actin more robustly in a phalloidin-like manner (Lemieux et al., 2014). In contrast,  
216 Ezrin's actin-binding domain (closely related to Moe; Fritzsche et al., 2013; Fritzsche et al., 2014)  
217 was shown to dissociate even faster from F-actin than  $\alpha$ -actinin's CH domains, consistent with

218 observations that full-length Moesin does not strongly co-localise with F-actin in embryonic chick  
219 neurons or PC12 cells (Amieva and Furthmayr, 1995; Marsick et al., 2012). We, therefore, predicted  
220 a gradual impact of the different actin-binding domains on Shot localisation and/or function in the  
221 hierarchical sequence Life > Shot CH1+2 ≥ Moe.

222 We first analysed the localisation of the different actin-binding domains fused to the N-terminal lead  
223 sequence of Shot-PE (GFP::A\*::CH1+2, GFP::A\*::Life, GFP::A\*::Moe; Fig.S3) by transfecting them  
224 into *Drosophila* primary neurons. Like GFP controls, also GFP::A\*::CH1+2 and GFP::A\*::Moe were  
225 distributed fairly homogeneously throughout entire neurons, consistent with their expected low  
226 affinity for F-actin (Fig.S3A-C). In contrast, GFP::A\*::Life showed the expected robust, phalloidin-like  
227 staining (Fig. S3D). None of the three fusion constructs caused any obvious MT phenotypes  
228 (Fig.S3E).

229 We next replaced both CH domains in Shot-PE::GFP with Life or Moe (Fig.1G,H) and generated  
230 transgenic flies using the same genomic landing site as utilised for other transgenic constructs in  
231 this study (see Methods); this makes sure that the expression strength was comparable between  
232 constructs (Bischof et al., 2007). When targeted to primary neurons, Shot-PE-Moe::GFP behaved  
233 like the  $\Delta$ CH1 and  $\Delta$ plakin constructs: it was enriched along MTs in distal axons accompanied by  
234 mild axon shortening and a trend towards increased spool formation (Figs.1G",K,L). In contrast,  
235 Shot-PE-Life::GFP localised strongly in GCs but also along axons (Figs. 1H", 3 and S4) and caused  
236 axon shortening and spool induction to similar degrees as Shot-PE::GFP (Fig.1K,L). However, other  
237 subcellular features were strikingly novel: (1) 38% of Shot-PE-Life::GFP-induced MT spools in GCs  
238 had a 'tennis racket' appearance with many MTs projecting diffusely through the centre of spools  
239 (Fig.3A and 'white arrows' in Fig.S4); (2) a number of neurons showed unusual MT bundles in close  
240 proximity to the cortex in the cell bodies (Fig.3D and 'open curved arrows' in Fig.S4); (3) about 60%  
241 of axonal MT bundles were split into two parallel portions that were decorated with strong Shot-PE-  
242 Life::GFP staining, and closely accompanied by F-actin staining that was unusually strong for axon  
243 shafts (Fig.3B,C and 'white arrowheads' in Fig.S4); these constellations suggested that the hybrid  
244 construct firmly cross-links and alters the sub-cellular arrangement of MTs and F-actin whilst taking  
245 on an unusual localisation itself (Figs.3 and S4; see Discussion). The aberrant localisation of Shot-  
246 PE-Life::GFP and its dominant MT phenotypes were clearly abolished when treating neurons with  
247 LatA, thus demonstrating the F-actin dependence even of this powerful hybrid construct (Fig.3E-G).

248 Taken together, our GOF analyses suggest that the quality and quantity of F-actin networks can  
249 regulate Shot's MT bundle-inducing function. The low affinity of Shot's CH domains seems ideally  
250 tuned to read those differences in F-actin: high abundance of F-actin induces spools in GCs, and  
251 increases in Shot's F-actin affinity (Shot-PE-Life) cause bundle modifications (split bundles) even in  
252 axon shafts (where F-actin networks are usually sparse; Qu et al., 2017; Xu et al., 2013).

253

#### 254 Shot's axon length regulation involves MT spool formation in GCs and MT bundle maintenance

255 Our key readout for Shot GOF was the formation of MT spools in GCs. MT spools have been  
256 suggested to inhibit axon growth (Dent et al., 1999; Sánchez-Soriano et al., 2010). Accordingly, we  
257 find a strong negative correlation between spools and axon lengths when plotting the data from our  
258 over-expression experiments (black dots in Fig.4A); also neurons without Shot GOF plot onto this  
259 curve (Fig.4F,G and orange dots in A), including untreated wild-type neurons, neurons treated with  
260 LatA (less spools, enhanced axon length), or neurons lacking the F-actin-promoting factor Chickadee  
261 (Chic, the sole profilin in *Drosophila*; Gonçalves-Pimentel et al., 2011; slightly less spools, modest  
262 increase in axon length). Also spool formation in neurons without Shot GOF seems to be mediated

263 by Shot, as suggested by *shot* mutant neurons where spool numbers are strongly reduced (Fig.4F;  
264 Sánchez-Soriano et al., 2010).

265 However, *shot* mutant neurons do not plot onto the correlation curve (blue dots in Fig.4A): instead  
266 of showing axon extension that would usually correlate with the absence of spools, their axons are  
267 very short. Furthermore, combinatorial studies revealed that the short axon phenotype of *shot*  
268 overrides LatA- or *chic*-induced axon elongation (Fig.4E,G). These short axon phenotypes of *shot*  
269 seem to mirror the occurrence of MT disorganisation in *shot* mutant neurons, where axonal bundles  
270 lose their parallel arrangements and take on curled, criss-crossing appearances (referred to as MT  
271 curling; Fig.4C). Like the axon length phenotype, axonal MT curling is not influenced by LatA  
272 treatment or loss of Chic (Fig.4E,G,H), thus demonstrating a further parallel between both  
273 phenotypes.

274

### 275 Shot seems to work through two redundant mechanisms in MT bundle maintenance

276 Previous work has demonstrated that Shot prevents MT curling through a F-actin/Eb1/MT guidance  
277 mechanism: via its N-terminus it binds cortical F-actin and via its C-terminus to MTs and Eb1 - thus  
278 guiding the extension of polymerising MTs along the axonal cortex into parallel bundles; this F-  
279 actin/Eb1/MT guidance mechanism is supported by numerous structure-function, loss-of-function,  
280 pharmacological and genetic interaction studies (details in Fig.5; Alves-Silva et al., 2012; Hahn et  
281 al., 2021; Qu et al., 2019; Sánchez-Soriano et al., 2009).

282 The F-actin/Eb1/MT guidance mechanisms would predict that removal of cortical F-actin from wild-  
283 type neurons (which can be achieved with the F-actin-inhibiting drug CytoD, but less so with LatA or  
284 loss of Chic; Qu et al., 2017) should mimic the *shot* mutant MT curling phenotype. However, CytoD  
285 application to wild-type neurons fails to cause MT curling; instead it causes a deficit in MT  
286 polymerisation leading to gaps in MT bundles (Figs.S1B, 6B, 5B; Qu et al., 2017) – which may also  
287 explain why loop suppression upon CytoD staining (Fig.S1) does not enhance axon growth as  
288 observed with LatA (Sánchez-Soriano et al., 2010).

289 The fact that CytoD fails to mimic the MT curling phenotype observed in *shot* mutant neurons (Fig.6B  
290 vs. C) might indicate that F-actin/Eb1/MT guidance is not the only mechanism through which Shot  
291 contributes to MT bundle maintenance. For example, Shot might work through further isoforms  
292 beyond Shot-PE (the only isoform shown so far mediating guidance; Fig.5E,F,H-J). To test this  
293 possibility, we used Shot-deficient mutant neurons in which the MT curling phenotype was rescued  
294 by the F-actin/Eb1/MT guidance mechanisms, i.e. the expression of Shot-PE (Figs.5E, 6E). When  
295 these seemingly normal neurons were treated with CytoD, strong MT curling was induced (Figs.6F,  
296 5F), suggesting that these neurons lack some actin-independent bundle-maintaining functions of  
297 Shot that are present in wild-type neurons.

298 F-actin/Eb1/MT cross-linkage requires the CH1 and Ctail domains of Shot, as revealed by rescue  
299 experiments in *shot* mutant neurons (using Shot-PC and Shot-PE- $\Delta$ Ctail; Fig.5I,J). These two  
300 domains are specifically missing in *shot*<sup>kakP2</sup> and *shot*<sup>V104</sup> mutant alleles, which do not affect the rest  
301 of the endogenous *shot* gene locus (details in Figs.1A and 7; Bottenberg et al., 2009; Gregory and  
302 Brown, 1998). The two alleles should therefore eliminate the guidance mechanism, but might retain  
303 the other bundle-maintaining function of Shot ('PH' in Figs.4 I,J vs. K,L).

304 When analysed in whole embryos, both mutant alleles clearly caused partial loss-of-function mutant  
305 phenotypes: *shot*<sup>kakP2</sup> strongly affected the nervous system (Bottenberg et al., 2009; Gregory and  
306 Brown, 1998), and *shot*<sup>V104</sup> defects seemed to restrict to non-neuronal tissues (Fig.S6). When  
307 cultured as primary neurons, we measured the degree of MT curling in the axon shaft, which is the

308 area where the guidance mechanism is expected to make its prime contributions. For *shot*<sup>V104</sup> we  
309 found no obvious phenotype, *shot*<sup>kakP2</sup> revealed only a trend, whereas the *shot*<sup>3</sup> null mutant alleles  
310 displayed severe MT curling along axon shafts (Fig.8A-D,F). For *shot*<sup>V104</sup> mutant neurons we  
311 repeated the experiment culturing them on concanavalin A which is a more challenging condition  
312 causing greater mechanical strain (Prokop et al., 2012). When challenged this way, *shot*<sup>V104</sup> mutant  
313 neurons displayed robust MT curling. This suggests that loss of the F-actin/MT/Eb1 guidance  
314 mechanism weakens the overall machinery of MT bundle maintenance: under modest conditions, its  
315 absence can be masked by the other functions of Shot, but not when mechanically challenged.

316

## 317 Discussion

### 318 Neuronal roles of Shot involve isoform-specific actin-dependent and -independent functions

319 Spectraplakins are well conserved across the animal kingdom; they are essential cytoskeletal  
320 regulators in neurons, linked to severe MT curling in mammals and *Drosophila* alike (Voelzmann et  
321 al., 2017). Many mechanistic insights were gained using *Drosophila* Shot as a model, and F-actin/MT  
322 linkage has emerged as a central theme that is consistent also with roles in non-neuronal cells  
323 (Kodama et al., 2003). Here we refined our understanding of Shot's actin dependency during MT  
324 regulation, whilst also proposing the co-existence of actin-independent functions involved in MT  
325 bundle promotion.

326

### 327 Shot's roles in spool formation are regulated by F-actin

328 Our findings suggest that F-actin is an important instructor of Shot's MT-regulating roles. For  
329 example in GCs, Shot is an essential regulator of spool formation in an F-actin-dependent manner:  
330 (1) it can be suppressed when depleting F-actin (LatA, CytoD; Sánchez-Soriano et al., 2010), (2)  
331 when changing the properties of F-actin networks (CK666), or (3) when changing Shot's actin-  
332 binding properties as observed with Shot-PC, Shot-PE- $\Delta$ ABD, Shot-PE- $\Delta$ CH2, Shot-PE-Moe and  
333 Shot-PE-Life. In contrast, in the axon shaft, F-actin networks are far less prominent (Xu et al., 2013),  
334 which seems sufficient to support cortical guidance of MT polymerisation but not enough to induce  
335 prominent changes to MT bundles even when overexpressing Shot-PE. In contrast, Shot-PE-Life  
336 was able to induce abnormal MT bundle split in the shaft, suggesting that increased F-actin affinity  
337 is sufficient to tip the balance in an F-actin-sparse environment and change the MT-regulating  
338 behaviour of Shot.

339 Taken together, these experiments suggest that proper Shot function requires well-balanced  
340 interaction with F-actin networks, and the spectacular phenotypes we observe with Shot-PE-Life  
341 (Figs.3 and S4) suggest, that our findings can be turned into new genetic tools to investigate how  
342 changes in the cytoskeleton impact on neuronal architecture, dynamics and even physiology.

343 Our experiments with Shot-PE-Life have demonstrated a clear F-actin-dependence of the induced  
344 MT phenotypes (Fig.3F,G). They also suggested that this construct was able to induce ectopic F-  
345 actin in axon shafts (Figs.3, S4), potentially reflecting mutual regulation mediated through Shot. This  
346 may involve known roles of the Shot C-terminus in promoting F-actin nucleation (Sánchez-Soriano  
347 et al., 2009), thus creating a scenario in which the strong localisation of Shot-PE-Life along axon  
348 shafts might trigger a positive feedback loop by nucleating more F-actin which then enhances Shot-  
349 PE-Life localisation.

350 In normal Shot-PE, direct binding through the CH domains might not be sufficient to trigger changes  
351 in Shot function, and also the plakin domain appears functionally involved. To our knowledge, the



352 only plakin domain-binding factors reported so far are transmembrane adhesion factors including  
353 integrins and collagen XVII at mammalian hemidesmosomes (Aumailley et al., 2006) and potentially  
354 the N-CAM homologue Fasciclin II in *Drosophila* neurons (Voelzmann et al., 2017). Since the  
355 localisation of such adhesion factors is dependent on F-actin (Woichansky et al., 2016), they might  
356 provide a potential second route through which F-actin can influence Shot activity.

357 In summary, we have built a case for regulatory impacts of F-actin networks on Shot function which,  
358 in turn, trigger MT network changes that impact on axon growth; this is best exemplified by the  
359 negative correlation between spool formation and axon growth (Fig.4A; Dent et al., 1999; Sánchez-  
360 Soriano et al., 2010).

361

### 362 Shot displays prominent F-actin-independent roles in axons

363 Shot also plays major roles in maintaining MT bundles in axon shafts. We confirmed here the  
364 importance of F-actin/MT/Eb1 cross-linkage for MT guidance into parallel bundles (Alves-Silva et al.,  
365 2012; Hahn et al., 2021; Figs.6, 8). We believe that these roles are merely permissive and not subject  
366 to F-actin dependent regulation, because F-actin networks in axon shafts appear sparse and far less  
367 dynamic when compared to GCs. The key impact of MTs not staying in proper bundles is likely due  
368 to the fact that they cannot contribute with the same rigour to the growth events at GCs.

369 In addition to the guidance mechanism involving F-actin/MT/Eb1 cross-linkage, we also presented  
370 strong arguments for additional functions of Shot in MT bundle maintenance that are independent of  
371 this form of cross-linkage. Considering the enormous importance that MT bundles have for the long-  
372 term survival of axons, it appears only logical to have redundant mechanisms to maintain these  
373 bundles and prevent axonopathies (Prokop, 2021).

374 In our view, the best candidate to mediate such F-actin-independent functions of Shot is the unique  
375 Shot-PH isoform. Shot-PH is highly expressed in the nervous system, has a C\*-type N-terminus  
376 (non-F-actin-binding like Shot-PC; Fig.1A), and stands out as the only isoform containing a large  
377 central PRR (plakin repeat region; Fig.S7; flybase.org reference: [FBgn0013733](#); Hahn et al., 2016;  
378 Röper and Brown, 2003; Voelzmann et al., 2017).

379 PRRs are conserved in mammalian dystonin and ACF7/MACF1 (Voelzmann et al., 2017), but very  
380 little is known about their role or potential binding partners. PRRs of *Drosophila* Shot play regulatory  
381 roles at epithelial adherens junctions through unknown mechanisms (Röper and Brown, 2003). In  
382 mammals, the PRR-containing isoform MACF1b was shown to associate with the Golgi (Lin et al.,  
383 2005). However, it is difficult to imagine how Golgi-related mechanisms could maintain MT bundles  
384 in the absence of F-actin-dependent guidance mechanisms of Shot. In our view, investigating the  
385 potential roles and mechanisms of PRRs in axons would therefore have great potential to deliver  
386 new mechanisms that can advance our understanding of axon maintenance and architecture  
387 (Prokop, 2020).

388 As a first step to study PRRs, we generated flies carrying a CRISPR/Cas9-mediated PRR deletion.  
389 Unfortunately, *shot*<sup>ΔPRR</sup> mutant flies displayed unexpected splicing defects resulting in a strong loss-  
390 of-function mutant allele (details in Fig.S7); whilst being potentially interesting for molecular  
391 geneticists that work on splicing mechanisms, this allele was unsuitable for our purposes. An  
392 alternative strategy could be to identify PRR-binding or -associating proteins (Lin et al., 2021), and  
393 then use versatile *Drosophila* genetics in combination with our culture model (Prokop et al., 2013) to  
394 establish their potential involvement in bundle maintenance. Amongst the PRR-interacting proteins,  
395 we would expect to find also Eb1-binding proteins or even Eb1 itself (note that PRR contains a  
396 potentially Eb1-interacting SNLP motif as similarly found in the Ctail; Fig.7C; Honnappa et al., 2009);

397 a link from the PRR to Eb1 could explain an important conundrum posed by the current data: loss of  
398 Eb1 causes MT curling, but the deletion of the Eb1-binding Ctail from all Shot isoforms does not  
399 (Fig.5G vs. K) – the PRR might be the missing puzzle piece.

400 Taken together, we propose a system of redundant Shot-mediated mechanisms that promote axonal  
401 MT bundle architecture - in addition to other factors expected to be involved, such as classical MAPs  
402 or mitotic kinesins (Guha et al., 2021; Hahn et al., 2019; Prokop, 2020). Such robust redundancy  
403 makes sense when considering the enormous importance of these MT bundles for axonal longevity  
404 (Prokop, 2021). We believe that the study of Shot-PH can establish new investigative paths towards  
405 a more profound understanding of axon architecture, thus bridging a gap in the field that may provide  
406 important explanations for a wide range of axonopathies and new avenues for their treatment.

407

## 408 **Materials and Methods**

409

### 410 Fly strains

411 The following fly stocks were used: Oregon R as wild-type control and the strong loss-of-function or  
412 null alleles *chic*<sup>221</sup> (Verheyen and Cooley, 1994), *shot*<sup>3</sup> (Kolodziej et al., 1995), *shot*<sup>kakP2</sup> (synonymous  
413 to *P{lacW}shot*<sup>k03405</sup>; Gregory and Brown, 1998), *shot*<sup>HG25</sup> (Prokop et al., 1998) and *shot*<sup>V104</sup> (Strumpf  
414 and Volk, 1998). All mutant stocks were kept and selected with *twi-Gal4/UAS-GFP* green balancers  
415 (Halfon et al., 2002). Existing transgenic lines we used included the *scabrous-Gal4*, *eve-Gal4*<sup>RN2E</sup>  
416 and *stripe-Gal4* driver lines (Fujioka et al., 1999; Mlodzik et al., 1990; Subramanian et al., 2003),  
417 *UAS-mCD8::GFP* (Luo et al., 1994), *UAS-shot-RE-GFP* and *UAS-shot-RC-GFP* (Lee and Kolodziej,  
418 2002), *UAS-EGC-GFP* (Subramanian et al., 2003), *UAS-shot-RE-Δplakin-GFP* (Bottenberg et al.,  
419 2009) and *UAS-Act5C-GFP* (Bloomington Stock Center; Kelso et al., 2002).

420

### 421 Drosophila primary neuronal cell culture

422 Neuronal cell cultures were generated as detailed elsewhere (Prokop et al., 2012; Voelzmann and  
423 Sánchez-Soriano, 2021). Embryos were dechorionated for 1.5 min in 50% domestic bleach, correct  
424 stages (usually stage 11; Campos-Ortega and Hartenstein, 1997) and genotypes were selected  
425 under a fluorescent dissecting microscope, transferred to sterilised centrifuge tubes containing 100µl  
426 of 70% ethanol, washed in sterile Schneider's medium containing 20% fetal calf serum  
427 (Schneider's/FCS; Gibco) and, eventually, homogenised with micro-pestles in 1.5 ml centrifuge  
428 tubes containing 21 embryos per 100 µl dispersion medium (Prokop et al., 2012). They were left to  
429 incubate for 4 min at 37°C. Dispersion was stopped with 200 µl Schneider's/FCS, cells were spun  
430 down for 4 mins at 650 g, supernatant was removed and cells were re-suspended in 90 µl of  
431 Schneider's/FCS; 30 µl drops were placed in culture chambers and covered with cover slips. Cells  
432 were allowed to adhere to cover slips for 90-120 min either directly on glass or on cover slips coated  
433 with a 5 µg/ml solution of concanavalin A, and then grown as a hanging drop culture at 26°C usually  
434 for 6-8 hrs.

435 Transfection of *Drosophila* primary neurons was executed as described previously (Qu et al., 2019).  
436 In brief, 70-75 embryos per 100 µl dispersion medium were used. After the washing step and  
437 centrifugation, cells were re-suspended in 100 µl transfection medium [final media containing 0.1-  
438 0.5 µg DNA and 2 µl Lipofectamine 2000 (L2000, Invitrogen)], incubated following manufacturer's  
439 protocols (Thermo Fisher, Invitrogen) and kept for 24 hrs at 26°C. Cells were then treated again with  
440 dispersion medium, re-suspended in culture medium and plated out as described above.

441

442 Drug application and immunohistochemistry

443 For drug treatments, solutions were prepared in cell culture medium from stock solutions in DMSO.  
444 Cells were treated for 4 hrs with 200 nM latrunculin A (Biomol International), 0.4 µg/ml cytochalasin  
445 D (Sigma) or 100 nM CK666 (Sigma), respectively. For controls, equivalent concentrations of DMSO  
446 were diluted in Schneider's medium.

447 Culture medium was carefully removed and cells fixed for 30 mins with 4% paraformaldehyde in 0.05  
448 M phosphate buffer (pH 7-7.2), then washed in PBT (phosphate buffered saline with 0.3% TritonX-  
449 100). Incubation with antibodies was performed in PBT without blocking reagents. The following  
450 antibodies were used: anti- $\alpha$ -tubulin (clone DM 1A, 1:1000, mouse, Sigma), anti-Shot raised against  
451 aa3450-4714 (C-terminal end of the spectrin repeat region; guinea pig; 1:200; Strumpf and Volk,  
452 1998); anti-GFP (1:500, goat, Abcam), and FITC-, Cy3 - or Cy5-conjugated secondary antibodies  
453 (1:200, purified from donkey, Jackson Immunoresearch). F-actin was stained with TRITC- or Cy5-  
454 conjugated Phalloidin (Sigma; 1:100). Coverslips with stained neurons were mounted on slides using  
455 Vectashield medium (Vector labs) or ProLong Gold Antifade Mountant (ThermoFisher Scientific).

456

457 Stage 17 embryo dissections

458 Dissection of late stage 17 embryos (stages according to Campos-Ortega and Hartenstein, 1997)  
459 was carried as described in great detail elsewhere (Budnik et al., 2006). In brief, embryos were  
460 dissected flat in PBS on Sylgard-coated cover slips with the help of sharpened tungsten needles and  
461 Histoacryl glue (Braun, Melsungen, Germany), followed by 1 hr fixation in 4% paraformaldehyde, 1  
462 hr wash in PBT and the same histochemical staining steps as mentioned above using the following  
463 antibodies: anti-FasII (1D4 2F3, DSHB; mouse, 1:20; Van Vactor et al., 1993), anti-GFP (see above)  
464 and anti-Synaptotagmin (rabbit polyclonal; 1:1,000; Littleton et al., 1993). Embryos were cut out from  
465 the glue using razor blade splinters or the tungsten needles and embedded in glycerol.

466

467 Imaging and image analysis

468 Standard imaging was performed with AxioCam 506 monochrome (Carl Zeiss Ltd.) or MatrixVision  
469 mvBlueFox3-M2 2124G digital cameras mounted on BX50WI or BX51 Olympus compound  
470 fluorescent microscopes. Measurements from images were carried out using ImageJ (segmented  
471 line and freehand selection tools). Only neurites at least twice the length of the soma diameter were  
472 analysed using  $\alpha$ -tubulin staining and measuring from the edge of the cell body to the tips of the  
473 axons (excluding MTs in filopodia); in cases where neurites branched the longer branch was  
474 measured, in cases where 2 neurites extended from a single cell the longer value was taken. The  
475 degree of disorganised MT curling in axon shafts was established either as binary readout (% of  
476 neurons with disorganisation) or as "MT disorganisation index" (MDI) described previously (Qu et  
477 al., 2019; Qu et al., 2017); in short: the area of disorganised curling was measured with the freehand  
478 selection in ImageJ; this value was then divided by axon length (see above) multiplied by 0.5 µm  
479 (typical axon diameter, thus approximating the expected area of the axon if it were properly bundled);  
480 in this study, MDI measurements were restricted to the axon shaft, i.e. from the cell body to the base  
481 of GCs (white dashed lines in Figs. 6, 8). Filopodia numbers were counted per neurite. GCs  
482 containing looped MT bundles (spools) were classified according to previous publications (Sánchez-  
483 Soriano et al., 2010). Graphpad Prism was used to describe data and perform statistical tests. Data  
484 were usually not normally distributed, and the median was determined for axon length; since MDI

485 measurements contain many zero-value data, the mean and standard error of the mean (SEM) had  
486 to be used to obtain meaningful numbers. For statistical analyses, the Chi-square test was used  
487 when comparing percentages, Kruskal–Wallis one-way ANOVA test to compare groups, and Mann–  
488 Whitney Rank Sum Tests (indicated as  $P_{MW}$ ) to compare pairs of data. For the correlation,  $r$  and  $p$ -  
489 value were determined via non-parametric Spearman correlation analysis (tests showed that data  
490 are not distributed normally).

491

#### 492 Electron microscopy

493 Procedures followed protocols published in detail elsewhere (Budnik et al., 2006). In brief, embryos  
494 were injected with 5% glutaraldehyde in 0.05 M phosphate buffer, pH 7.2, the injected specimens  
495 were cut open at their tips with a razor blade splinter, postfixed for 30-60 min in 2.5% glutaraldehyde  
496 in 0.05 M phosphate buffer, briefly washed in 0.05 M phosphate buffer, fixed for 1 h in aqueous 1%  
497 osmium solution, briefly washed in dH<sub>2</sub>O, treated en bloc with an aqueous 2% solution of uranyl  
498 acetate for 30 min, dehydrated, and then transferred to araldite or TAAB LV (TAAB Laboratories  
499 Equipment, Berkshire, UK). Serial sections of 30-50 nm (silver-grey) thickness were transferred to  
500 formvar-covered carbon-coated slot grids, poststained with lead citrate for 5-10 min, and then  
501 examined on a JEOL 200CX (Peabody, MA) or Hitachi H600 (Tokyo, Japan).

502

#### 503 Cloning of *shot* constructs

504 The CH deletions ( $\Delta$ CH1,  $\Delta$ CH2,  $\Delta$ ABD; *UAS-shot.RE-DeltaABD.GFP* now available at Bloomington,  
505 #93282) were made by PCR amplification of 2 DNA fragments flanking the CH domains, using  
506 respective primers listed in the table which contained homologous sequences to anneal them into a  
507 template for further PCR amplification. The PCR product was digested and ligated into *pET20b*  
508 vector (Novagen) using *Ascl* and *XhoI*. To insert alternative actin-binding domains (Lifeact source:  
509 *pCMVLifeAct-TagGFP2* vector, Ibbidi; Moesin was a gift from Tom Millard; Millard and Martin, 2008;  
510 *UAS-shot.RE-Lifeact.GFP* now available at Bloomington, #93283), they were amplified in parallel to  
511 the 2 CH domain-flanking sequences and annealed in triplet constellation for making the template.  
512 PCR amplification was used to add *NotI/XbaI* restriction sites to the 5' and 3' ends followed by  
513 digestion and ligation into a modified version of the *pUASp* vector (Invitrogen; kindly provided by  
514 Tom Millard) which confers ampicillin resistance and tags the construct N-terminally with eGFP  
515 (referred to as *pUASp-eGFP*). N-terminal constructs in *pUASp-eGFP* were amplified in chemically  
516 competent TOP10 *E. coli*. and used for transfection into primary neurons (see above).

517 For making the respective full-length Shot-PE constructs carrying the N-terminal variations (Shot-  
518 PE- $\Delta$ ABD, Shot-PE- $\Delta$ CH1, Shot-PE- $\Delta$ CH2, Shot-PE-Life, Shot-PE-Moe), *Nterm\_Recomb* primers  
519 were used to amplify the N-terminal constructs from the *pET20b* vector. These were then used to  
520 replace the *Galk* cassette in full-length shot-RE within *M-6-attB-UAS-1-3-4* vector via  
521 recombineering strategies (Alves-Silva et al., 2012) and the positive/negative selection strategy  
522 (Warming et al., 2005). The *Galk* cassette was originally inserted into *M-6-attB-UAS-1-3-4 shot-RE*-  
523 borne *shot-RE* by using similar recombineering steps with *Galk* which had been amplified with  
524 primers that added the same homology arms as mentioned above.

525 The completed constructs in *M-6-attB-UAS-1-3-4* vector were amplified in Epi300 competent cells  
526 (EpiCentre) in LB-Chloramphenicol medium, adding CopyControl solution (EpiCentre) 2 hrs before  
527 the miniprep. Amplified constructs were used to generate transgenic flies (outsourced to BestGene,  
528 Chino Hills, CA 91709, US) using PhiC31-mediated site-specific insertion using a specific attB  
529 landing site on the third chromosome (*PBac{y<sup>+</sup>-attP-3B}CG13800<sup>VK00031</sup>*; Bloomington line #9748;

530 Alves-Silva et al., 2012). This same landing site was used for all constructs to avoid position effects  
 531 and achieve equal expression levels of all constructs (Bischof et al., 2007).

532

533 **Tab. 1** List of primers

| Name                | Sequence                                                            |
|---------------------|---------------------------------------------------------------------|
| pUASP_Nterm_Fw      | TTAATCGCGGCCGCAATGGCATCGCATTCTAC                                    |
| pUASP_Nterm_Rev     | GGCAACTCTAGACTAAAGGATAACCTCGCGATC                                   |
| pUASP_Nterm_seq_Fw  | GACAACCACTACCTGAGC                                                  |
| pUASP_Nterm_seq_Rev | CTTGACCATGGGTTTAGG                                                  |
| Nterm_ΔCH1_Fw_3b    | CTCACCCAGTTTAAAGACGAACGCATCTCCGATATTGTTGTGGG<br>CAAAGAG             |
| Nterm_ΔCH1_Rev_3a   | CTCTTTGCCCAACAATATCGGAGATGCGTTCGTCTTTAACT<br>GGGTGAG                |
| Nterm_ΔCH2_Fw_2b    | GATATTGTTGTGGGCAAAGAGGACGAGCCACCCTCTATCCATCC<br>ACTC                |
| Nterm_ΔCH2_Rev_2a   | GAGTGGATGGATAGAGGGTGGCTCGTCCTCTTTGCCCAACA<br>ATATC                  |
| Nterm_ΔCH_Fw_4b     | CTCACCCAGTTTAAAGACGAACGCGAGCCACCCTCTATCCATCC<br>ACTC                |
| Nterm_ΔCH_Rev_4a    | GAGTGGATGGATAGAGGGTGGCTCGCGTTCGTCTTTAACTGG<br>GTGAG                 |
| Nterm_lifect_Fw_6b  | GATTTGATCAGAAATTCGAAAGCATCTCAAAGGAAGAAGAGCCA<br>CCCTCTATCCATCCACTC  |
| Nterm_lifect_Rev_6a | GATGCTTTTCGAATTTCTTGATCAAATCTGCGACACCCATGCGTT<br>CGTCTTTAACTGGGTGAG |
| Nterm_moesin_Fw_7b  | CGCGTCGATCAGTTTGAGAACATGGAGCCACCCTCTATCCATCC<br>ACTC                |
| Nterm_moesin_Rev_7a | CTGGCGAACGTTCTCGCGATGAATGGCATCGCGTTCGTCTTTAA<br>ACTG                |
| Nterm_moesin_Fw_7c  | CAGTTTAAAGACGAACGCGATGCCATTCATCGCGAGAACGTTCCG<br>CCAG               |
| Nterm_moesin_Rev_7c | GAGTGGATGGATAGAGGGTGGCTCCATGTTCTCAAACCTGATCG<br>ACGCG               |
| Nterm_Seq_Fw_New    | CCACAACGGTTTCCCTCTAG                                                |
| Nterm_seq_Rev_New   | GCTAGTTATTGCTCAGCG                                                  |
| Nterm_Recomb_Fw     | GAGAACAGCAGCAGTCCG                                                  |
| Nterm_Recomb_Rev    | CAGGTAGGCGGTCTTCTC                                                  |

534

535 Generating *shot*<sup>APRR</sup> mutant flies

536 The PRR domain (exon 12 of *shot*-RH, FBtr0087621) was excised from the *shot* genomic region and  
537 replaced with 3xP3-DsRed (driving DsRed expression in the eye) via CRISPR/Cas9 mediated  
538 homology-directed repair. Suitable gRNA target sites (5' gRNA: GAGTGCTAACCTCCTGACTAG, 3'  
539 gRNA: CTGTTCTGCCGGCAGGAGCAC) were identified by CRISPR optimal target finder (Gratz et  
540 al., 2014) and cloned into pCFD4-U6:1\_U6:3tandemgRNAs (gift from Simon Bullock; Addgene  
541 plasmid # 49411; RRID:Addgene 49411) via Gibson assembly (NEB). Adjacent 2kb 5' and 3'  
542 homology regions were cloned into *pHD-DsRed-attP* (gift from Melissa Harrison & Kate O'Connor-  
543 Giles & Jill Wildonger, Addgene plasmid # 51019, RRID:Addgene\_51019) 5' region via EcoRI/NotI,  
544 3' region via BglII/PstI) using the following primer pairs:

- 545 • 5' HR fwEcoRI: AAAAGAATTCctcgtttgctcttacc
- 546 • 5' HR revNotI: AAAAGCGGCCCGCCTGAAAGGATTCGATTAGAACTTTATTAG
- 547 • 3' HR fwBglII AAAAAGATCTGTAAGTCTCAGAACACTCGAGG
- 548 • 3' HR revPstI AAAACTGCAGTCGATCTCATCCTTGATTTGCTATTTAAAC

549 Constructs were injected into *M{Act5C-Cas9.P.RFP}-ZH-2A DNAlig4<sup>169</sup>* flies (Bloomington stock  
550 #58492) and selected for dsRed positive flies. Positive candidates were confirmed by sequencing.

551

552 qRT-PCR analysis of *shot*<sup>APRR</sup> mutant embryos

553 For RNA isolation, at least ten *Drosophila* third instar larvae were placed in Trizol (Invitrogen) and  
554 homogenised using a pestle. Total RNA was isolated using the NucleoSpin RNA II kit (Macherey &  
555 Nagel) and RNA concentration was analysed via a NanoDrop spectrophotometer (Thermo  
556 Scientific). For first strand cDNA synthesis, 500 ng of total RNA was transcribed using the QuantiTect  
557 RT Kit (Qiagen). Real-time PCR was performed with 1 µl cDNA per reaction using the Power SYBR  
558 Green PCR Master Mix (ThermoFischer Scientific) as detection dye. Experiments were performed  
559 with the BioRad C1000 Thermal Cycler. cDNA samples were run in triplicates, the average CT was  
560 used to analyse the expression levels via the  $-2\Delta\Delta CT$  method. Experiments were repeated with  
561 independently isolated RNA samples. Actin 5C (Act5C, act) and Ribosomal protein L32 (RpL32,  
562 rp49) were used as reference genes. Expression analysis was performed using BioRad C1000  
563 System software and GraphpadPrism. The following oligonucleotides were used for real time PCR  
564 analysis (Fig.S7A):

- 565 • Ctail (recognises almost all isoforms): fw – GGTC CATCATCAAGGTACG; rev –  
566 CATGGCTACCCTCGTTGTC
- 567 • SRR (recognises all isoforms): fw – ACTGAAGGAACAATGGACTCG; rev –  
568 CCAGAAAGAAGCAAAGCCTC
- 569 • PRR1 (recognises only PRR): fw – TCTACACCACTACCTACAGCA; rev –  
570 CAAGCCATCGCTACTATAGACG
- 571 • CH2 (recognises all isoforms): fw – GAAGTATCCCGTCCACGAG; rev –  
572 ACCACTCAATGTGCTCCTG
- 573 • CH2 (recognises only A\*- and B\*-type isoforms; Fig.1A): fw –  
574 CACCATCATCAGAGCTACCA; rev – CGTTCCATTGTTGCCACC

575

576 Sequencing the *shot*<sup>V104</sup> breakpoint

577 The chromosomal breakpoint of *shot*<sup>V104</sup> was described to be in a 373bp region between bp73,398  
578 and bp73,771 of the *shot* locus (Strumpf and Volk, 1998). We used an inverse PCR approach to  
579 determine the exact chromosomal break-point of *shot*<sup>V104</sup>. For this, genomic DNA of 200  
580 homozygous *shot*<sup>V104</sup> embryos was isolated (Berkeley *Drosophila* Genome Project protocol;  
581 <https://www.fruitfly.org/about/methods/inverse.pcr.html>) and restricted with Sau96I. The restricted  
582 DNA was purified, diluted 10:1 and ligated into circular fragments. Using primer pairs designed to  
583 face towards the unknown region covering the breakpoint (fw: CCTGCTTTCAAACATCCTGC;  
584 rev: CTGGCTGAATGGCAATTAAGG), the circular DNA fragment containing the *shot*<sup>V104</sup>  
585 breakpoint region was amplified using a High Fidelity PCR Kit (Eppendorf and Roche). PCR products  
586 were gel-extracted, cloned into pDrive (Qiagen) and sequenced. The sequencing of one inverse  
587 PCR fragment showed a perfect alignment with wild-type genomic DNA until bp73.681 followed by  
588 an adenine and thymine-rich region. Using BLAST (<https://flybase.org>) we identified this region as  
589 part of the centromeric region of chromosome 2R (Fig.7). To confirm the breakpoint, sequence-  
590 specific primers were designed: a forward primer binding the wild-type *shot* region 100 bp upstream  
591 of the breakpoint (sense primer: TCTACGCTTGCGCTGCCCGCTCGCC) and three reverse primers;  
592 these were (1) antisense wt1 binding the wild-type region before the breakpoint:  
593 TTTGTACGCATTGGCATGGCAGATG; (2) antisense wt2 binding the wild-type region directly after:  
594 GGCAGATGCACAGATGCATTTATATACGC, and (3) antisense mutant 1 in the putative new  
595 *shot*<sup>V104</sup> sequence after the breakpoint: TGTTAGTTCTTATACAAGAAGATTCAATAAATAAAGC.  
596 PCR results confirmed the breakpoint (Fig.7).

597

## 598 Acknowledgements

599 Work reported here was made possible through the support of A.P. by the BBSRC (BB/C515998/1,  
600 BB/I002448/1, BB/M007553/1) and the Wellcome Trust (084561/Z/07/Z, 077748/Z/05/Z,  
601 087820/Z/08/Z, 092403/Z/10/Z), of the BBSRC to N.S.S. (BB/R018960/1), and by parents as well as  
602 the Faculty of Life Sciences to Y.Q. The Manchester Bioimaging Facility microscopes used in this  
603 study were purchased with grants from the BBSRC, The Wellcome Trust and The University of  
604 Manchester Strategic Fund. The Fly Facility has been supported by funds from The University of  
605 Manchester and the Wellcome Trust (087742/Z/08/Z). Stocks obtained from the Bloomington  
606 *Drosophila* Stock Center (NIH P40OD018537) were used in this study.

607

## 608 References

- 609 Alves-Silva, J., Hahn, I., Huber, O., Mende, M., Reissaus, A., Prokop, A. (2008). Prominent actin  
610 fibre arrays in *Drosophila* tendon cells represent architectural elements different from stress  
611 fibres. *Mol. Biol. Cell* **19**, 4287-97 -- <https://doi.org/10.1091/mbc.e08-02-0182>
- 612 Alves-Silva, J., Sánchez-Soriano, N., Beaven, R., Klein, M., Parkin, J., Millard, T., Bellen, H.,  
613 Venken, K. J. T., Ballestrem, C., Kammerer, R. A., Prokop, A. (2012). Spectraplakins promote  
614 microtubule-mediated axonal growth by functioning as structural microtubule-associated proteins  
615 and EB1-dependent +TIPs (Tip Interacting Proteins). *J. Neurosci* **32**, 9143-58 --  
616 <https://doi.org/10.1523/JNEUROSCI.0416-12.2012>
- 617 Amieva, M. R., Furthmayr, H. (1995). Subcellular localization of moesin in dynamic filopodia,  
618 retraction fibers, and other structures involved in substrate exploration, attachment, and cell-cell  
619 contacts. *Exp Cell Res* **219**, 180-96 -- <http://doi.org/10.1006/excr.1995.1218>
- 620 Aumailley, M., Has, C., Tunggal, L., Bruckner-Tuderman, L. (2006). Molecular basis of inherited skin-  
621 blistering disorders, and therapeutic implications. *Expert Rev Mol Med* **8**, 1-21 --  
622 <https://doi.org/10.1017/s1462399406000123>

- 623 Bischof, J., Maeda, R. K., Hediger, M., Karch, F., Basler, K. (2007). An optimized transgenesis  
624 system for *Drosophila* using germ-line-specific varphiC31 integrases. *Proc Natl Acad Sci U S A*  
625 **104**, 3312-7 -- <https://doi.org/10.1073/pnas.0611511104>
- 626 Blanchoin, L., Boujemaa-Paterski, R., Sykes, C., Plastino, J. (2014). Actin dynamics, architecture,  
627 and mechanics in cell motility. *Physiol Rev* **94**, 235-63 -- <http://www.ncbi.nlm.nih.gov/pubmed/24382887>
- 628 Bottenberg, W., Sánchez-Soriano, N., Alves-Silva, J., Hahn, I., Mende, M., Prokop, A. (2009).  
629 Context-specific requirements of functional domains of the spectraplakins Short stop *in vivo*. *Mech*  
630 *Dev* **126**, 489-502 -- <https://doi.org/10.1016/j.mod.2009.04.004>
- 631 Bray, D. (1984). Axonal growth in response to experimentally applied mechanical tension. *Dev Biol*  
632 **102**, 379-89. -- [https://doi.org/10.1016/0012-1606\(84\)90202-1](https://doi.org/10.1016/0012-1606(84)90202-1)
- 633 Buck, K. B., Zheng, J. Q. (2002). Growth cone turning induced by direct local modification of  
634 microtubule dynamics. *J Neurosci* **22**, 9358-67 -- <https://doi.org/10.1523/jneurosci.22-21-09358.2002>
- 635 Budnik, V., Gorczyca, M., Prokop, A. (2006). Selected methods for the anatomical study of  
636 *Drosophila* embryonic and larval neuromuscular junctions. *The fly neuromuscular junction:*  
637 *structure and function - Int. Rev. Neurobiol.* **75**, 323-74 -- [https://doi.org/10.1016/s0074-7742\(06\)75015-2](https://doi.org/10.1016/s0074-7742(06)75015-2)
- 638 Byers, T. J., Beggs, A. H., McNally, E. M., Kunkel, L. M. (1995). Novel actin crosslinker superfamily  
639 member identified by a two step degenerate PCR procedure. *FEBS Lett* **368**, 500-4 --  
640 [https://doi.org/10.1016/0014-5793\(95\)00722-1](https://doi.org/10.1016/0014-5793(95)00722-1)
- 641 Campos-Ortega, J. A., Hartenstein, V. (1997). The embryonic development of *Drosophila*  
642 *melanogaster*. Springer Verlag, Berlin, pp. 227 -- <https://www.springer.com/gb/book/9783662224915>
- 643 Datar, A., Ameeramja, J., Bhat, A., Srivastava, R., Mishra, A., Bernal, R., Prost, J., Callan-Jones, A.,  
644 Pullarkat, P. A. (2019). The roles of microtubules and membrane tension in axonal beading,  
645 retraction, and atrophy. *Biophys J* **117**, 880-891 -- <https://doi.org/10.1016/j.bpj.2019.07.046>
- 646 Dent, E. W., Callaway, J. L., Szebenyi, G., Baas, P. W., Kalil, K. (1999). Reorganisation and  
647 movement of microtubules in axonal growth cones and developing interstitial branches. *J*  
648 *Neurosci* **19**, 8894-908 -- <https://doi.org/10.1523/JNEUROSCI.19-20-08894.1999>
- 649 Dent, E. W., Gupton, S. L., Gertler, F. B. (2011). The growth cone cytoskeleton in axon outgrowth  
650 and guidance. *Cold Spring Harb Perspect Biol* **3**, a001800 -- <http://doi.org/10.1101/cshperspect.a001800>
- 651 Dogterom, M., Koenderink, G. H. (2019). Actin–microtubule crosstalk in cell biology. *Nat Rev Mol*  
652 *Cell Biol* **20**, 38-54 -- <https://doi.org/10.1038/s41580-018-0067-1>
- 653 Duchen, L. W., Strich, S. J., Falconer, D. S. (1964). Clinical and pathological studies of an hereditary  
654 neuropathy in mice (dystonia musculorum). *Brain* **87**, 367-78 --  
655 <http://www.ncbi.nlm.nih.gov/pubmed/14188280>
- 656 Edvardson, S., Cinnamon, Y., Jalas, C., Shaag, A., Maayan, C., Axelrod, F. B., Elpeleg, O. (2012).  
657 Hereditary sensory autonomic neuropathy caused by a mutation in dystonin. *Ann Neurol* **71**, 569-  
658 72 -- <http://www.ncbi.nlm.nih.gov/pubmed/22522446>
- 659 Eyer, J., Cleveland, D. W., Wong, P. C., Peterson, A. C. (1998). Pathogenesis of two axonopathies  
660 does not require axonal neurofilaments. *Nature* **391**, 584-7 -- <https://doi.org/10.1038/35378>
- 661 Franze, K., Janmey, P. A., Guck, J. (2013). Mechanics in neuronal development and repair. *Annu*  
662 *Rev Biomed Eng* **15**, 227-51 -- <http://www.ncbi.nlm.nih.gov/pubmed/23642242>
- 663 Fritzsche, M., Lewalle, A., Duke, T., Kruse, K., Charras, G. (2013). Analysis of turnover dynamics of  
664 the submembranous actin cortex. *Mol Biol Cell* **24**, 757-67 -- <http://doi.org/10.1091/mbc.E12-06-0485>
- 665 Fritzsche, M., Thorogate, R., Charras, G. (2014). Quantitative analysis of ezrin turnover dynamics in  
666 the actin cortex. *Biophys J* **106**, 343-53 -- <http://doi.org/10.1016/j.bpj.2013.11.4499>
- 667 Fujioka, M., Emi-Sarker, Y., Yusibova, G. L., Goto, T., Jaynes, J. B. (1999). Analysis of an *even-*  
668 *skipped* rescue transgene reveals both composite and discrete neuronal and early blastoderm



- 669 enhancers, and multi-stripe positioning by gap gene repressor gradients. *Development* **126**,  
670 2527-38 -- <https://doi.org/10.1242/dev.126.11.2527>
- 671 Geraldo, S., Khanzada, U. K., Parsons, M., Chilton, J. K., Gordon-Weeks, P. R. (2008). Targeting of  
672 the F-actin-binding protein drebrin by the microtubule plus-tip protein EB3 is required for  
673 neuritogenesis. *Nat Cell Biol* **10**, 1181-9 -- <https://doi.org/10.1038/ncb1778>
- 674 Gonçalves-Pimentel, C., Gombos, R., Mihály, J., Sánchez-Soriano, N., Prokop, A. (2011). Dissecting  
675 regulatory networks of filopodia formation in a *Drosophila* growth cone model. *PLoS ONE* **6**,  
676 e18340 -- <https://doi.org/10.1371/journal.pone.0018340>
- 677 Goriounov, D., Leung, C. L., Liem, R. K. (2003). Protein products of human Gas2-related genes on  
678 chromosomes 17 and 22 (hGAR17 and hGAR22) associate with both microfilaments and  
679 microtubules. *J Cell Sci* **116**, 1045-58 -- <https://doi.org/10.1242/jcs.00272>
- 680 Goryunov, D., He, C. Z., Lin, C. S., Leung, C. L., Liem, R. K. (2010). Nervous-tissue-specific  
681 elimination of microtubule-actin crosslinking factor 1a results in multiple developmental defects in  
682 the mouse brain. *Mol Cell Neurosci* **44**, 1-14 -- <https://doi.org/10.1016/j.mcn.2010.01.010>
- 683 Gratz, S. J., Ukken, F. P., Rubinstein, C. D., Thiede, G., Donohue, L. K., Cummings, A. M.,  
684 O'Connor-Giles, K. M. (2014). Highly specific and efficient CRISPR/Cas9-catalyzed homology-  
685 directed repair in *Drosophila*. *Genetics* **196**, 961-971 -- <https://doi.org/10.1534/genetics.113.160713>
- 686 Gregory, S. L., Brown, N. H. (1998). *kakapo*, a gene required for adhesion between cell layers in  
687 *Drosophila*, encodes a large cytoskeletal linker protein related to plectin and dystrophin. *J. Cell*  
688 *Biol.* **143**, 1271-82 -- <https://dx.doi.org/10.1083%2Fjcb.143.5.1271>
- 689 Guha, S., Patil, A., Muralidharan, H., Baas, P. W. (2021). Microtubule sliding in neurons. *Neurosci*  
690 *Lett*, 135867 -- <https://doi.org/10.1016/j.neulet.2021.135867>
- 691 Hahn, I., Ronshaugen, M., Sánchez-Soriano, N., Prokop, A. (2016). Functional and genetic analysis  
692 of spectraplakins in *Drosophila*. *Methods Enzymol* **569**, 373-405 --  
693 <https://doi.org/10.1016/bs.mie.2015.06.022>
- 694 Hahn, I., Voelzmann, A., Liew, Y.-T., Costa-Gomes, B., Prokop, A. (2019). The model of local axon  
695 homeostasis - explaining the role and regulation of microtubule bundles in axon maintenance and  
696 pathology *Neural Dev* **14**, 10.1186/s13064-019-0134-0 -- <https://doi.org/10.1186/s13064-019-0134-0>
- 697 Hahn, I., Voelzmann, A., Parkin, J., Fuehle, J. B., Slater, P. G., Lowery, L. A., Sanchez-Soriano, N.,  
698 Prokop, A. (2021). Tau, XMAP215 and Eb co-operatively regulate microtubule polymerisation and  
699 bundle formation in axons. *PLoS Genet* **17**, e1009647 -- <https://doi.org/10.1371/journal.pgen.1009647>
- 700 Halfon, M. S., Gisselbrecht, S., Lu, J., Estrada, B., Keshishian, H., Michelson, A. M. (2002). New  
701 fluorescent protein reporters for use with the *Drosophila* Gal4 expression system and for vital  
702 detection of balancer chromosomes. *Genesis* **34**, 135-8 -- <https://doi.org/10.1002/gene.10136>
- 703 Harrison, R. G. (1910). The outgrowth of the nerve fiber as a mode of protoplasmic movement. *J*  
704 *Exp Zool* **9**, 787-846 -- <https://doi.org/10.1002/jez.1400090405>
- 705 Hetrick, B., Han, Min S., Helgeson, Luke A., Nolen, Brad J. (2013). Small molecules CK-666 and  
706 CK-869 inhibit actin-related protein 2/3 complex by blocking an activating conformational change.  
707 *Chem Biol* **20**, 701-12 -- <https://doi.org/10.1016/j.chembiol.2013.03.019>
- 708 Honnappa, S., Gouveia, S. M., Weisbrich, A., Damberger, F. F., Bhavesh, N. S., Jawhari, H.,  
709 Grigoriev, I., van Rijssel, F. J., Buey, R. M., Lawera, A., Jelesarov, I., Winkler, F. K., Wuthrich, K.,  
710 Akhmanova, A., Steinmetz, M. O. (2009). An EB1-binding motif acts as a microtubule tip  
711 localization signal. *Cell* **138**, 366-76 -- <https://doi.org/10.1016/j.cell.2009.04.065>
- 712 Ka, M., Jung, E. M., Mueller, U., Kim, W. Y. (2014). MACF1 regulates the migration of pyramidal  
713 neurons via microtubule dynamics and GSK-3 signaling. *Dev Biol* **395**, 4-18 --  
714 <http://www.ncbi.nlm.nih.gov/pubmed/25224226>

- 715 Ka, M., Kim, W. Y. (2015). Microtubule-Actin Crosslinking Factor 1 is required for dendritic  
716 arborization and axon outgrowth in the developing brain. *Mol Neurobiol* --  
717 <http://doi.org/10.1007/s12035-015-9508-4>
- 718 Kelso, R. J., Hudson, A. M., Cooley, L. (2002). *Drosophila* Kelch regulates actin organization via  
719 Src64-dependent tyrosine phosphorylation. *J Cell Biol* **156**, 703-13 --  
720 <https://doi.org/10.1083/jcb.200110063>
- 721 Kiehart, D. P., Galbraith, C. G., Edwards, K. A., Rickoll, W. L., Montague, R. A. (2000). Multiple  
722 forces contribute to cell sheet morphogenesis for dorsal closure in *Drosophila*. *J Cell Biol* **149**,  
723 471-90 -- <https://doi.org/10.1083/jcb.149.2.471>
- 724 Kodama, A., Karakesisoglou, I., Wong, E., Vaezi, A., Fuchs, E. (2003). ACF7: an essential integrator  
725 of microtubule dynamics. *Cell* **115**, 343-354 -- [https://doi.org/10.1016/s0092-8674\(03\)00813-4](https://doi.org/10.1016/s0092-8674(03)00813-4)
- 726 Kolodziej, P. A., Jan, L. Y., Jan, Y. N. (1995). Mutations that affect the length, fasciculation, or ventral  
727 orientation of specific sensory axons in the *Drosophila* embryo. *Neuron* **15**, 273-286 --  
728 [https://doi.org/10.1016/0896-6273\(95\)90033-0](https://doi.org/10.1016/0896-6273(95)90033-0)
- 729 Korenbaum, E., Rivero, F. (2002). Calponin homology domains at a glance. *J Cell Sci* **115**, 3543-5 -  
730 - <https://doi.org/10.1242/jcs.00003>
- 731 Krieg, M., Stühmer, J., Cueva, J. G., Fetter, R., Spilker, K., Cremers, D., Shen, K., Dunn, A. R.,  
732 Goodman, M. B. (2017). Genetic defects in  $\beta$ -spectrin and tau sensitize *C. elegans* axons to  
733 movement-induced damage via torque-tension coupling. *Elife* **6**, e20172 --  
734 <https://doi.org/10.7554/eLife.20172>
- 735 Kundu, T., Dutta, P., Nagar, D., Maiti, S., Ghose, A. (2021). Coupling of dynamic microtubules to F-  
736 actin by Fmn2 regulates chemotaxis of neuronal growth cones. *J Cell Sci* **134** --  
737 <https://doi.org/10.1242/jcs.252916>
- 738 Lamoureux, P., Heidemann, S. R., Martzke, N. R., Miller, K. E. (2010). Growth and elongation within  
739 and along the axon. *Dev Neurobiol* **70**, 135-49 -- <http://doi.org/10.1002/dneu.20764>
- 740 Lee, A. C., Suter, D. M. (2008). Quantitative analysis of microtubule dynamics during adhesion-  
741 mediated growth cone guidance. *Dev Neurobiol* **68**, 1363-77 -- <https://doi.org/10.1002/dneu.20662>
- 742 Lee, S., Harris, K.-L., Whittington, P. M., Kolodziej, P. A. (2000). *short stop* is allelic to *kakapo*, and  
743 encodes rod-like cytoskeletal-associated proteins required for axon extension. *J Neurosci* **20**,  
744 1096-1108 -- <https://doi.org/10.1523/jneurosci.20-03-01096.2000>
- 745 Lee, S., Kolodziej, P. A. (2002). Short stop provides an essential link between F-actin and  
746 microtubules during axon extension. *Development* **129**, 1195-1204 --  
747 <https://doi.org/10.1242/dev.129.5.1195>
- 748 Lemieux, M. G., Janzen, D., Hwang, R., Roldan, J., Jarchum, I., Knecht, D. A. (2014). Visualization  
749 of the actin cytoskeleton: different F-actin-binding probes tell different stories. *Cytoskeleton*  
750 (*Hoboken*) **71**, 157-69 -- <https://doi.org/10.1002/cm.21160>
- 751 Leterrier, C., Dubey, P., Roy, S. (2017). The nano-architecture of the axonal cytoskeleton. *Nature*  
752 *Reviews Neuroscience* **18**, 713-726 -- <http://dx.doi.org/10.1038/nrn.2017.129>
- 753 Leung, C. L., Sun, D., Zheng, M., Knowles, D. R., Liem, R. K. H. (1999). Microtubule actin cross-  
754 linking factor (MACF): A hybrid of dystonin and dystrophin that can interact with the actin and  
755 microtubule cytoskeleton. *J Cell Biol* **147**, 1275-1285 -- <https://doi.org/10.1083/jcb.147.6.1275>
- 756 Lin, C.-M., Li, P.-N., Chen, H.-J. (2021). Purification of subdomains of the plakin repeat domain in  
757 microtubule actin-crosslinking factor1b from bacteria. *MC-Trans Biotechnol* **12**, e2 --  
758 <https://bio.mcu.edu.tw/sites/default/files/u3/file/2021/2021v12e2%20.pdf>
- 759 Lin, C. M., Chen, H. J., Leung, C. L., Parry, D. A., Liem, R. K. (2005). Microtubule actin crosslinking  
760 factor 1b: a novel plakin that localizes to the Golgi complex. *J Cell Sci* **118**, 3727-38 --  
761 <https://doi.org/10.1242/jcs.02510>

- 762 Lindsley, D. L., Zimm, G. G. (1992). The genome of *Drosophila melanogaster*. Academic Press, pp.  
763 1133 --
- 764 Littleton, J. T., Bellen, H. J., Perin, M. S. (1993). Expression of Synaptotagmin in *Drosophila* reveals  
765 transport and localization of synaptic vesicles to the synapse. *Development* **118**, 1077-88 --  
766 <https://doi.org/10.1242/dev.118.4.1077>
- 767 Löhr, R., Godenschwege, T., Buchner, E., Prokop, A. (2002). Compartmentalization of central  
768 neurons in *Drosophila*: a new strategy of mosaic analysis reveals localization of pre-synaptic sites  
769 to specific segments of neurites. *J Neurosci* **22**, 10357-10367 -- [https://doi.org/10.1523/JNEUROSCI.22-  
770 23-10357.2002](https://doi.org/10.1523/JNEUROSCI.22-23-10357.2002)
- 771 Lowery, L. A., van Vactor, D. (2009). The trip of the tip: understanding the growth cone machinery.  
772 *Nat Rev Mol Cell Biol* **10**, 332-43 -- <https://doi.org/10.1038/nrm2679>
- 773 Lu, W., Lakonishok, M., Gelfand, V. I. (2015). Kinesin-1-powered microtubule sliding initiates axonal  
774 regeneration in *Drosophila* cultured neurons. *Mol Biol Cell* -- <http://doi.org/10.1091/mbc.E14-10-1423>
- 775 Luo, L., Liao, Y. J., Jan, L. Y., Jan, Y. N. (1994). Distinct morphogenetic functions of similar small  
776 GTPases: *Drosophila* Drac1 is involved in axonal outgrowth and myoblast fusion. *Genes Dev.* **8**,  
777 1787-1802 -- <https://doi.org/10.1101/gad.8.15.1787>
- 778 Marsick, B. M., San Miguel-Ruiz, J. E., Letourneau, P. C. (2012). Activation of ezrin/radixin/moesin  
779 mediates attractive growth cone guidance through regulation of growth cone actin and adhesion  
780 receptors. *J Neurosci* **32**, 282-96 -- <https://doi.org/10.1523/jneurosci.4794-11.2012>
- 781 Millard, T. H., Martin, P. (2008). Dynamic analysis of filopodial interactions during the zippering  
782 phase of *Drosophila* dorsal closure. *Development* **135**, 621-6 -- <https://doi.org/10.1242/dev.014001>
- 783 Miller, K. E., Sheetz, M. P. (2006). Direct evidence for coherent low velocity axonal transport of  
784 mitochondria. *J Cell Biol* **173**, 373-81 -- <http://doi.org/10.1083/jcb.200510097>
- 785 Mlodzik, M., Baker, N. E., Rubin, G. M. (1990). Isolation and expression of *scabrous*, a gene  
786 regulating neurogenesis in *Drosophila*. *Genes Dev* **4**, 1848-61 -- <https://doi.org/10.1101/gad.4.11.1848>
- 787 Mohan, R., John, A. (2015). Microtubule-associated proteins as direct crosslinkers of actin filaments  
788 and microtubules. *IUBMB Life* **67**, 395-403 -- <https://doi.org/10.1002/iub.1384>
- 789 Prokop, A. (2020). Cytoskeletal organization of axons in vertebrates and invertebrates. *J Cell Biol*  
790 **219**, e201912081 -- <https://doi.org/10.1083/jcb.201912081>
- 791 Prokop, A. (2021). A common theme for axonopathies? The dependency cycle of local axon  
792 homeostasis. *Cytoskeleton* **78**, 52–63 -- <https://doi.org/10.1002/cm.21657>
- 793 Prokop, A., Beaven, R., Qu, Y., Sánchez-Soriano, N. (2013). Using fly genetics to dissect the  
794 cytoskeletal machinery of neurons during axonal growth and maintenance. *J. Cell Sci.* **126**, 2331-  
795 41 -- <http://dx.doi.org/10.1242/jcs.126912>
- 796 Prokop, A., Küppers-Munther, B., Sánchez-Soriano, N. (2012). Using primary neuron cultures of  
797 *Drosophila* to analyse neuronal circuit formation and function. *The making and un-making of  
798 neuronal circuits in Drosophila* **69**, 225-47 -- [http://dx.doi.org/10.1007/978-1-61779-830-6\\_10](http://dx.doi.org/10.1007/978-1-61779-830-6_10)
- 799 Prokop, A., Sánchez-Soriano, N., Gonçalves-Pimentel, C., Molnár, I., Kalmár, T., Mihály, J. (2011).  
800 DAAM family members leading a novel path into formin research. *Commun Integr Biol* **4**, 538-42  
801 -- <http://doi.org/10.4161/cib.4.5.16511>
- 802 Prokop, A., Uhler, J., Roote, J., Bate, M. C. (1998). The kakapo mutation affects terminal arborisation  
803 and central dendritic sprouting of *Drosophila* motorneurons. *J Cell Biol* **143**, 1283-1294 --  
804 <https://doi.org/10.1083/jcb.143.5.1283>
- 805 Qu, Y., Hahn, I., Lees, M., Parkin, J., Voelzmann, A., Dorey, K., Rathbone, A., Friel, C., Allan, V.,  
806 Okenve Ramos, P., Sánchez-Soriano, N., Prokop, A. (2019). Efa6 protects axons and regulates  
807 their growth and branching by inhibiting microtubule polymerisation at the cortex. *eLife* **8**, e50319  
808 -- <https://doi.org/10.7554/eLife.50319>

- 809 Qu, Y., Hahn, I., Webb, S. E. D., Pearce, S. P., Prokop, A. (2017). Periodic actin structures in  
810 neuronal axons are required to maintain microtubules. *Mol Biol Cell* **28** 296-308 --  
811 <https://doi.org/10.1091/mbc.e16-10-0727>
- 812 Ramón y Cajal, S. (1890). À quelle époque apparaissent les expansions des cellules nerveuses de  
813 la moëlle épinière du poulet. *Anatomischer Anzeiger* **21–22**, 609–639 --
- 814 Reuter, J. E., Nardine, T. M., Penton, A., Billuart, P., Scott, E. K., Usui, T., Uemura, T., Luo, L. (2003).  
815 A mosaic genetic screen for genes necessary for *Drosophila* mushroom body neuronal  
816 morphogenesis. *Development* **130**, 1203-13 -- <http://doi.org/10.1242/dev.00319>
- 817 Riedl, J., Crevenna, A. H., Kessenbrock, K., Yu, J. H., Neukirchen, D., Bista, M., Bradke, F., Jenne,  
818 D., Holak, T. A., Werb, Z., Sixt, M., Wedlich-Söldner, R. (2008). Lifeact: a versatile marker to  
819 visualize F-actin. *Nat Methods* **5**, 605-7 -- <https://doi.org/10.1038/nmeth.1220>
- 820 Roossien, D. H., Lamoureux, P., Van Vactor, D., Miller, K. E. (2013). *Drosophila* growth cones  
821 advance by forward translocation of the neuronal cytoskeletal meshwork in vivo. *PLoS One* **8**,  
822 e80136 -- <http://doi.org/10.1371/journal.pone.0080136>
- 823 Röper, K., Brown, N. H. (2003). Maintaining epithelial integrity: a function for gigantic spectraplakins  
824 isoforms in adherens junctions. *J Cell Biol* **162**, 1305-15 -- <http://doi.org/10.1083/jcb.200307089>
- 825 Sánchez-Soriano, N., Gonçalves-Pimentel, C., Beaven, R., Haessler, U., Ofner, L., Ballestrem, C.,  
826 Prokop, A. (2010). *Drosophila* growth cones: a genetically tractable platform for the analysis of  
827 axonal growth dynamics. *Dev Neurobiol* **70**, 58-71 -- <https://doi.org/10.1002/dneu.20762>
- 828 Sánchez-Soriano, N., Travis, M., Dajas-Bailador, F., Goncalves-Pimentel, C., Whitmarsh, A. J.,  
829 Prokop, A. (2009). Mouse ACF7 and *Drosophila* Short stop modulate filopodia formation and  
830 microtubule organisation during neuronal growth. *J Cell Sci* **122**, 2534-42 --  
831 <https://doi.org/10.1242/jcs.046268>
- 832 Sanes, D. H., Reh, T. A., Harris, W. A., Landgraf, M. (2019). Development of the nervous system  
833 (4th edition). Academic Press, San Diego, pp. 360 -- [https://www.elsevier.com/books/development-of-the-](https://www.elsevier.com/books/development-of-the-nervous-system/sanes/978-0-12-803996-0)  
834 [nervous-system/sanes/978-0-12-803996-0](https://www.elsevier.com/books/development-of-the-nervous-system/sanes/978-0-12-803996-0)
- 835 Sjöblom, B., Yläanne, J., Djinić-Carugo, K. (2008). Novel structural insights into F-actin-binding and  
836 novel functions of calponin homology domains. *Curr Opin Struct Biol* **18**, 702-8 --  
837 <https://doi.org/10.1016/j.sbi.2008.10.003>
- 838 Smith, D. H. (2009). Stretch growth of integrated axon tracts: extremes and exploitations. *Prog*  
839 *Neurobiol* **89**, 231-9 -- <http://doi.org/10.1016/j.pneurobio.2009.07.006>
- 840 Strumpf, D., Volk, T. (1998). Kakapo, a novel *Drosophila* protein, is essential for the restricted  
841 localization of the neuregulin-like factor, Vein, at the muscle-tendon junctional site. *J Cell Biol*  
842 **143**, 1259-1270 -- <http://doi.org/10.1083/jcb.143.5.1259>
- 843 Subramanian, A., Prokop, A., Yamamoto, M., Sugimura, K., Uemura, T., Betschinger, J., Knoblich,  
844 J. A., Volk, T. (2003). Short stop recruits EB1/APC1 and promotes microtubule assembly at the  
845 muscle-tendon junction. *Curr Biol* **13**, 1086-95 -- [https://doi.org/10.1016/s0960-9822\(03\)00416-0](https://doi.org/10.1016/s0960-9822(03)00416-0)
- 846 Suter, D. M., Forscher, P. (2001). Transmission of growth cone traction force through apCAM-  
847 cytoskeletal linkages is regulated by Src family tyrosine kinase activity. *J Cell Biol* **155**, 427-438 -  
848 <https://doi.org/10.1083/jcb.200107063>
- 849 Tanaka, E., Sabry, J. (1995). Making the connection: cytoskeletal rearrangements during growth  
850 cone guidance. *Cell* **83**, 171-6 -- <http://www.ncbi.nlm.nih.gov/pubmed/7585934>
- 851 Teng, J., Takei, Y., Harada, A., Nakata, T., Chen, J., Hirokawa, N. (2001). Synergistic effects of  
852 MAP2 and MAP1B knockout in neuronal migration, dendritic outgrowth, and microtubule  
853 organization. *J Cell Biol* **155**, 65-76 -- <https://doi.org/10.1083/jcb.200106025>
- 854 Tessier-Lavigne, M., Goodman, C. S. (1996). The molecular biology of axon guidance. *Science* **274**,  
855 1123-33 -- <https://doi.org/10.1126/science.274.5290.1123>

- 856 Van Vactor, D. V., Sink, H., Fambrough, D., Tsoo, R., Goodman, C. S. (1993). Genes that control  
857 neuromuscular specificity in *Drosophila*. *Cell* **73**, 1137-53 -- [https://doi.org/10.1016/0092-8674\(93\)90643-](https://doi.org/10.1016/0092-8674(93)90643-5)  
858 [5](https://doi.org/10.1016/0092-8674(93)90643-5)
- 859 Verheyen, E. M., Cooley, L. (1994). Profilin mutations disrupt multiple actin-dependent processes  
860 during *Drosophila* development. *Development* **120**, 717–728 -- <https://doi.org/10.1242/dev.120.4.717>
- 861 Voelzmann, A., Liew, Y.-T., Qu, Y., Hahn, I., Melero, C., Sánchez-Soriano, N., Prokop, A. (2017).  
862 *Drosophila* Short stop as a paradigm for the role and regulation of spectraplakins. *Semin Cell Dev*  
863 *Biol* **69**, 40-57 -- <http://doi.org/10.1016/j.semcdb.2017.05.019>
- 864 Voelzmann, A., Sánchez-Soriano, N. (2021). *Drosophila* primary neuronal cultures as a useful  
865 cellular model to study and image axonal transport *Methods Mol Biol* --
- 866 Warming, S., Costantino, N., Court, D. L., Jenkins, N. A., Copeland, N. G. (2005). Simple and highly  
867 efficient BAC recombineering using galK selection. *Nucleic Acids Res* **33**, e36 --  
868 <https://doi.org/10.1093/nar/gni035>
- 869 Winding, M., Kelliher, M. T., Lu, W., Wildonger, J., Gelfand, V. I. (2016). Role of kinesin-1-based  
870 microtubule sliding in *Drosophila* nervous system development. *Proc Natl Acad Sci U S A* **113**,  
871 E4985-94 -- <http://www.ncbi.nlm.nih.gov/pubmed/27512046>
- 872 Woichansky, I., Beretta, C. A., Berns, N., Riechmann, V. (2016). Three mechanisms control E-  
873 cadherin localization to the zonula adherens. *Nature Communications* **7**, 10834 --  
874 <https://doi.org/10.1038/ncomms10834>
- 875 Xu, K., Zhong, G., Zhuang, X. (2013). Actin, Spectrin, and associated proteins form a periodic  
876 cytoskeletal structure in axons. *Science* **339**, 452-6 -- <http://doi.org/10.1126/science.1232251>
- 877 Yin, L.-M., Schnoor, M., Jun, C.-D. (2020). Structural Characteristics, Binding Partners and Related  
878 Diseases of the Calponin Homology (CH) Domain. *Front Cell Dev Biol* **8** --  
879 <https://doi.org/10.3389/fcell.2020.00342>
- 880 Zheng, J., Lamoureux, P., Santiago, V., Dennerll, T., Buxbaum, R. E., Heidemann, S. R. (1991).  
881 Tensile regulation of axonal elongation and initiation. *J Neurosci* **11**, 1117-25 --  
882 <https://doi.org/10.1523/jneurosci.11-04-01117.1991>

883

884

## 885 Figures

886

887 **Fig.1.** Different Shot constructs and their localisation. **A)** Illustration of different Shot isoforms as a  
888 function of different start sites (A\*-D\*) and splice-in of different exons (X, PRR); different domains  
889 and motifs are colour-coded (CH, calponin homology; PD, plakin domain; PRR, plakin repeat region;  
890 SRR, spectrin repeat region; EFH, EF-hand; GRD, Gas2-related domain; MtLS, MT tip localization  
891 sequence which forms the Eb1-binding motifs); positions of the epitope used to generate the Shot-  
892 C antibody (Strumpf and Volk, 1998), the *kakP2* P-element insertion (blocking the A\* and B\* start  
893 sites) and the break-point of the *V104* inversion (deleting the Ctail) are indicated in red. **B-J)** Different  
894 UAS-constructs expressing modified Shot versions. **B'-J')** Primary neurons at 6-8 HIV cultured on  
895 glass which express the respective constructs on the left and are stained for actin (red), tubulin  
896 (green) and GFP (blue). **B''-J''**) GFP channel shown in grayscale. In all images, asterisks indicate  
897 cell bodies, arrow heads the axon tips; scale bar in A represents 10  $\mu$ m in all images. **K, L)** Graphs  
898 display the distribution of axon length phenotypes (K) and frequency of spools in neuronal GCs (L)  
899 taken from neuron populations expressing the same constructs as displayed in B-J". Number of  
900 neurons analysed are shown in orange, median values in blue (K only), black numbers within  
901 columns in L indicate the percentage of neurons with spool-containing GCs; black/grey numbers on

902 the right of each plot/bar indicate the P-values obtained via Mann–Whitney Rank Sum Tests in K  
903 (Kruskall-Wallis ANOVA test results shown above) and Chi-square tests in L. Data were normalised  
904 to wild-type controls performed in parallel to all experiments (red dashed lines).

905

906 **Fig.2.** Impact of drug-induced F-actin inhibition on Shot-PE function. **A-C)** Primary neurons at 6-8  
907 HIV on glass treated with DMSO (control), LatA or CK666 as indicated and stained for GFP (green),  
908 tubulin (red) and actin (blue); grayscale images below show single channels as indicated; asterisks  
909 indicate cell bodies, arrowheads the tips of axons; scale bar in A represents 10  $\mu$ m in all images. D)  
910 Frequency of neurons with GCs that contain spools (examples of neurons in A-C are assigned to  
911 their respective data columns via colour-coded squares); orange numbers indicate the sample  
912 numbers (number of neurons analysed), black numbers within columns the percentage of neurons  
913 with GCs that contain spools; numbers on the right of each graph indicate the P-values obtained via  
914  $\chi^2$  tests. Data were normalised to wild-type controls performed in parallel to all experiments  
915 (dashed red line).

916

917 **Fig.S1.** Impact of Cyto D on Shot-PE localisation. Primary neurons at 6-8 HIV on glass, treated with  
918 DMSO (control, **A**) or Cyto D (**B**) and stained for GFP (green), tubulin (red) and actin (blue);  
919 grayscale images on the right show single channels as indicated; asterisks indicate cell bodies,  
920 arrowheads the tip of axons; scale bar in A represents 10  $\mu$ m in all images. For similar results  
921 compare Fig.6E,F.

922

923 **Fig.S2.** Comparison of the CH domains of Shot and human  $\alpha$ 1-actinin. Sequences are taken from  
924 the ACTN1-203 isoform (ensembl.org: [ENST00000394419.9](https://ensembl.org/ENST00000394419.9)) and the Shot-PE isoform (flybase.org:  
925 [FBtr0087618](https://flybase.org/FBtr0087618)) and were aligned using UniProt Align ([www.uniprot.org/align](http://www.uniprot.org/align)); asterisks indicate  
926 identical residues, dots and colons similar residues. **A)** Alignment of the first (CH1, black) and second  
927 (CH2, blue) CH domain of Shot with the first CH domain of hACTN1 indicates a high similarity of  
928 CH1 but considerable deviation of CH2 from the prototype CH domain; structurally important  
929 residues are colour-coded and the actin-binding consensus is provided above in green, as detailed  
930 elsewhere (Yin et al., 2020). **B)** Alignment of both CH domains as they occur in tandem in Shot and  
931 hACTN1 indicates a higher degree of identity and similarity of the two second CH domains (blue) to  
932 one another, than to the first CH domain (as shown for Shot CH2 in A).

933

934 **Fig.S3.** Only the Life-containing N-terminus shows strong F-actin association. **A-D)** Primary neurons  
935 at 24 HIV on ConA transfected with GFP (controls) or N-terminal constructs as indicated on the left  
936 (colour code as used in Fig.1); grayscale images on the right show single channels, as indicated;  
937 asterisks indicate cell bodies, arrowheads the tip of axons; scale bar in A represents 15  $\mu$ m in all  
938 images. **E)** Bars correspond to experiments shown on the respective left and indicate the frequency  
939 of neurons with GCs that contain spools; number of neurons analysed are shown in orange, the  
940 percentage of neurons with GCs that contain spools in black in the bar, and P-values obtained via  
941  $\chi^2$  tests on top of bars. Data were normalised to wild-type controls performed in parallel to all  
942 experiments (dashed red line).

943

944 **Fig.3.** Characteristic phenotypes induced by Shot-PE-Life::GFP expression. **A-D)** Primary neurons  
945 at 6-8 HIV on glass with *scabrous-Gal4*-induced expression of Shot-PE-Life::GFP, stained for tubulin

946 (green), actin (red) and GFP (blue); boxed areas are shown as twofold magnified single channel  
947 grayscale images on the right, as indicated. **E,F**) Shot-PE-Life::GFP-expressing neurons treated with  
948 vehicle (E) or latrunculin A (LatA; F), stained for the same markers as above but colour-coded  
949 differently (as indicated); grayscale images below show single channels. Asterisks in A-F indicate  
950 cell bodies, arrowheads tips of axons, chevrons in E and F indicate areas of high GFP concentration,  
951 and the scale bar in A represents 10  $\mu\text{m}$  in all RGB images of A-D, 5  $\mu\text{m}$  in grayscale images of A-  
952 D, and 20  $\mu\text{m}$  in E. **G**) Percentage of Shot-PE-Life::GFP-expressing neurons showing spools (black)  
953 when treated with vehicle or LatA; number of analysed neurons in orange, percentage shown in bars,  
954 the  $\chi^2$  test result on the right.

955

956 **Fig.S4.** Animated GIF showing further examples of phenotypes induced by Shot-PE-Life::GFP  
957 expression. Primary neurons at 6-8 HIV on glass with *scabrous-Gal4*-induced expression of Shot-  
958 PE-Life::GFP, stained for tubulin (green), actin (red) and GFP (blue); the animation sequence shows  
959 single channels as grayscale images, as indicated top left in animation steps. Symbols indicate the  
960 following: asterisks, cell bodies; arrowheads, MT bundle split; arrows, 'tennis racket' spools; white  
961 curved arrows, unusual MT bundle malformations; open curved arrows, unusually bundled MTs in  
962 cell bodies. View or download: [https://figshare.com/articles/figure/Shot-PE-Life\\_GFP\\_animation/17056364](https://figshare.com/articles/figure/Shot-PE-Life_GFP_animation/17056364).

963

964 **Fig.4.** MT loops correlate with axon lengths but Shot has additional axon shaft phenotypes. **A)**  
965 Spearman correlation analysis comparing axon length and spool frequency. Black dots represent  
966 data from Fig.1K plotted against data from Fig.1L, and orange/blue dots match data from F and G;  
967 significant negative correlation ( $r$ - and  $P$ -values) for orange and black dots are shown in box at top.  
968 **B-E)** Primary neurons at 6-8 HIV on glass which are either wild-type (B), *shot*<sup>3/3</sup> (C), *chic*<sup>221/221</sup> (D) or  
969 *shot*<sup>3/3</sup> *chic*<sup>221/221</sup> (E), stained for tubulin (magenta) and actin (green); asterisks indicate cell bodies,  
970 arrowheads tips of axons, curved arrows areas of MT curling, and white/open arrows normal/short  
971 filopodia (see quantifications in Fig.S5); yellow-boxed areas presented as twofold magnified insets  
972 showing the tubulin channel in grayscale; the scale bar in B represents 10  $\mu\text{m}$  in all RGB images  
973 and 5  $\mu\text{m}$  in insets. **F-H)** Quantification of neurons displaying MT spools in GCs (F), of axon lengths  
974 (G) and of neurons displaying MT curling in axonal shafts (H); numbers of analysed neurons are  
975 indicated in orange; median values in blue (G), percentages as white numbers within columns (F,H);  
976  $P$ -values obtained via Mann–Whitney rank sum tests (G) or  $\chi^2$  tests (F,H) are shown in black/grey  
977 above bars or plotted data; all data were normalised to wild-type controls performed in parallel to all  
978 experiments (dashed red lines).

979

980 **Fig.S5.** Filopodia data accompanying analyses shown in Fig.4B-E. **A)** Schematics on the left  
981 summarise the key findings for wild-type, *shot*<sup>3/3</sup>, *chic*<sup>221/221</sup> or *shot*<sup>3/3</sup> *chic*<sup>221/221</sup> mutant primary  
982 neurons at 6-8 HIV on glass; indicated are: axon length (relative to black dashed line), filopodia  
983 number (black dots), filopodial length (white/open arrows) and MT disorganisation (curved arrows).  
984 **B,C)** Quantifications of filopodial lengths (B) and numbers of filopodia per neuron (C); numbers of  
985 analysed filopodia (B) or neurons (C) are indicated in orange; median values in blue, and  $P$ -values  
986 obtained via Mann–Whitney rank sum tests in black/grey; data were normalised to wild-type controls  
987 performed in parallel to all experiments (dashed red lines). Note that reduced filopodia numbers are  
988 due to regulatory roles of Shot in actin nucleation (Sánchez-Soriano et al., 2009), and shorter  
989 filopodia due to promoting roles of profilin/Chic in actin polymerisation (Gonçalves-Pimentel et al.,

990 2011); both mechanisms are independent and therefore fully penetrant in the double-mutant  
991 constellation.

992

993 **Fig.5.** Schematic overview of existing experiments addressing Shot roles in MT bundle organisation.  
994 **A)** Schematic section of the axonal surface including cortical actin (magenta) anchoring the Shot N-  
995 terminus of CH1-containing isoforms (here PE) and promotes MT polymerisation (dashed magenta  
996 arrow); via its C-terminus, Shot-PE binds EB1 (dark blue) and MTs (green) thus cross-linking  
997 polymerising MT tips to the cortex and guiding their extension into parallel bundles; the PRR-  
998 containing PH isoforms (shown in pale) does not bind F-actin but we propose that it contributes to  
999 MT bundle formation/maintenance through yet unknown mechanisms ('?'; see Discussion). **B-L)**  
1000 Different experimental conditions and their impact on MT behaviours; red numbers at bottom right  
1001 indicate the information source: 'F' refers to figure numbers in this publication, 'R' indicates external  
1002 references: (1) (Sánchez-Soriano et al., 2009), (2) (Alves-Silva et al., 2012), (3) (Qu et al., 2017), (4)  
1003 (Hahn et al., 2021); red arrow heads point at specific lesions. Explanations: in wild-type neurons,  
1004 CytoD eliminates cortical actin and weakens MT polymerisation (pale Eb1 with dashed outline), not  
1005 strong enough to affect parallel MT arrangements but leading to MT gaps (B); in the absence of Shot,  
1006 MTs curl (C) and MT networks shrink (they become vulnerable to lack of actin-promoting effects; D);  
1007 guiding function is fully re-instated by targeted expression of Shot-PE (E; constructs red encircled  
1008 with a green GFP dot at their ends); Shot-PE fails to guide MTs in the absence of actin, but it protects  
1009 MT polymerisation (F); Eb1 deficiency eliminates MT guidance (G); MT curling upon reduced Eb1  
1010 levels (Eb1↓) can be rescued with Shot-PE expression (H); MT curling caused by loss of Shot (or  
1011 Eb1; see Ref.4) cannot be rescued with Shot-PE variants that lack Ctail or Eb1-binding SxIP motifs  
1012 (I; see Fig.7C) or the CH1 domain (J); absence of the same domains in *shot*<sup>V104</sup> (K) or *shot*<sup>kakP2</sup> (L)  
1013 does not cause MT curling. We propose that the presence of the Shot-PH isoform (faintly shown in  
1014 A,B,K,L) protects axons against loss of actin or F-actin/MT/Eb1 guidance mechanism, i.e. conditions  
1015 which cause severe curling in the other experimental settings (C,F,G,I,J).

1016

1017 **Fig.6.** CytoD experiments confirming the F-actin-dependent guidance mechanism of Shot. **Left side:**  
1018 Primary neurons of different genotypes (as indicated: wt, wild-type; *shot*, *shot*<sup>3/3</sup>; *shot* + PE, *shot*<sup>3/3</sup>  
1019 expressing Shot-PE) at 6-8 HIV on ConA, treated with vehicle (DMSO) or cytochalasin D (CytoD) as  
1020 indicated, and stained for tubulin (green), actin (red) or GFP (blue); asterisks indicate cell bodies,  
1021 arrowheads the tip of axons, white lines demarcate the axon shaft, open arrows gaps in axonal  
1022 tubulin bundles and white/open curved arrows areas of normal/fractured MT curling; scale bar in B  
1023 represents 10 μm in all images. **Right side:** Quantification of the degree of MT curling in the axon  
1024 shafts (between white dashed lines or dashed line and arrow head in images on the left) of each  
1025 genotype, measured in MDI and normalised to wildtype controls (red dashed line); numbers of  
1026 neurons analysed are indicated in orange, mean ± SEM in blue and results of Mann-Whitney rank  
1027 sum tests are shown in black/grey. Further explanations are given in Fig.5.

1028

1029 **Fig.7.** The *shot*<sup>V104</sup> breakpoint removes the Ctail. **A)** View of the 2R polytene chromosome (Lindsley  
1030 and Zimm, 1992) indicating the mapped breakpoint in 50C (orange arrow) and potential sites of the  
1031 second breakpoint in the centromeric region of 2R (orange arrowheads) suggested by the mapping  
1032 positions of several clones with matching sequences (when using the BLAST function in flybase.org  
1033 and the blue sequence in B as query); clones with matching sequences: *DS03708* (42A4-42A5),  
1034 *BACR04E10* (41C-41D), *BACR07J16* (41C-41C), *BACR05A24* (41C-41D), *BACR05A24* (41C-41D),



1035 *BACR03D04* (40D-40D). **B**) Alignment of the wild-type and *V104* mutant genomic sequences of *shot*  
1036 indicating the breakpoint (yellow arrow) in position 13,868,412 (primary assembly 2R: 13,864,237-  
1037 13,925,503 reverse strand) and the newly fused sequence in *shot*<sup>V104</sup> (blue) likely derived from the  
1038 other end of the inversion that would usually be situated near the position of the second breakpoint  
1039 (orange arrow in A). **C**) Schematic of the Shot-PE protein (FBtr0087618) drawn to scale and  
1040 indicating domain/motif borders (coloured numbers below; compare Fig.1A) as well as exon borders  
1041 (stippled vertical lines, grey numbers, exon numbers indicated between lines); *V104* the breakpoint  
1042 is situated in intron 22/23. **D**) The predicted V104 protein is truncated behind the GRD (yellow arrow)  
1043 potentially reading into intronic sequences (grey). Comparison of the V104 sequence at the  
1044 breakpoint (highlighted yellow) with sequences of GRDs from normal Shot and other GRD-containing  
1045 proteins (listed in grey; taken from Alves-Silva et al., 2012) strongly suggest that the truncation does  
1046 not affect the final  $\alpha$ -helix and amino acid changes occur behind the GRD. **E-G**) Ventral nerve cords  
1047 of stage 16 embryos (cx, cortex containing cell bodies; np, neuropile containing synapses and as-  
1048 /descending tracts; both separated by dashed yellow lines) stained with the Shot-C antibody against  
1049 the C-terminal part of the spectrin repeat rod (Fig.1A; Strumpf and Volk, 1998); staining reveals the  
1050 presence of protein in wild-type (E), absence in homozygous *shot* null mutant embryos (F) and  
1051 presence in hemizygous *shot*<sup>V104/MK1</sup> mutant embryos where reduced expression is due to the  
1052 absence of one gene copy (*V104* is over the *MK1* deficiency); scale bar in E represents 20  $\mu$ m in E-  
1053 G.

1054

1055 **Fig.S6.** Phenotypes of *shot*<sup>V104</sup> mutant embryos. All images are taken from late stage 17 embryos of  
1056 wild-type controls (wt; left), strong *shot* mutant alleles (HG25, sf20/3, sf20, middle; Lee et al., 2000;  
1057 Prokop et al., 1998), and *shot*<sup>V104</sup> mutant embryos (right). **1<sup>st</sup> row:** Fascilin 2-stained (Fas2) ventral  
1058 nerve cords (part of the CNS; white arrow pointing at the most lateral longitudinal fascicle); only  
1059 strong Shot deficiency causes the upregulation of Fas2 in nerve roots (open white arrow; Bottenberg  
1060 et al., 2009; Prokop et al., 1998). **2<sup>nd</sup> row:** flat dissected embryos stained for the synaptic marker  
1061 Synaptotagmin (Syt; white arrowheads pointing at neuromuscular synapses); stained dots are  
1062 severely reduced only by strong Shot deficiency (open arrowhead; Löhner et al., 2002). **3<sup>rd</sup> row:** a detail  
1063 of the ventral nerve cord expressing the membrane marker CD8::GFP driven by *eve*<sup>RN2</sup>-*Gal4* in a  
1064 subset of motor neurons; somata (S), dendrites (D) and axons (A) are indicated: dendrites reduced  
1065 only upon strong Shot deficiency (Bottenberg et al., 2009; Prokop et al., 1998). **4<sup>th</sup> row:** flat dissected  
1066 embryos expressing actin::GFP driven by *stripe-Gal4* (*sr*) in epidermal tendon cells (anchoring cells  
1067 where muscles attach); only in the wild-type do tendon cells have their usual cell shapes (white  
1068 curved arrow), whereas tendon cells become stretched (open curved arrows) upon strong Shot  
1069 deficiency and in *shot*<sup>V104</sup>, indicating defects of the muscle-tendon junction (MTJ; Alves-Silva et al.,  
1070 2008). **5<sup>th</sup> & 6<sup>th</sup> row:** micrographs of MTJs, central parts of which are shown twofold enlarged below;  
1071 electron-dense MTJs (indicated by double chevrons) between muscles (m) and tendon cells (t) are  
1072 properly formed in all genotypes, but the sub-membranous electron dense layer on the tendon cell  
1073 side (black arrow in wt) is much thinner in the two *shot* mutant conditions (open arrows), and the  
1074 characteristic MT arrays (arrowhead in wt) are absent, indicating the *shot*-specific tendon cell rupture  
1075 phenotype (Prokop et al., 1998). This MTJ rupture in *shot*<sup>V104</sup> embryos is consistent with reports that  
1076 Shot-PE- $\Delta$ Ctail cannot rescue *shot* mutant tendon cell phenotypes (Alves-Silva et al., 2012), and  
1077 that the Shot-PH isoform is not enriched in this cell type (Röper and Brown, 2003). Scale bar in A  
1078 represents 20  $\mu$ m in 1<sup>st</sup>, 40  $\mu$ m in 2<sup>nd</sup>, 7  $\mu$ m in 3<sup>rd</sup>, 30  $\mu$ m in 4<sup>th</sup>, 1.2  $\mu$ m in 5<sup>th</sup> and 0.6  $\mu$ m in 6<sup>th</sup> row.

1079

1080 **Fig.8.** Phenotypes of *shot*<sup>kakP2</sup> and *shot*<sup>V104</sup> mutant primary neurons. **A-D,G,H)** Images of neurons at  
1081 6-8 HIV of different genotypes (wt, wild-type; 3, *shot*<sup>3/3</sup>; *kakP2*, *shot*<sup>kakP2/kakP2</sup>; V104, *shot*<sup>V104/Df(MK1)</sup>)  
1082 cultured on glass (A-D) or ConA (G,H) and stained for tubulin (green), actin (red) or GFP (blue);  
1083 greyscale images on the right show only the tubulin channel; asterisks indicate cell bodies,  
1084 arrowheads the tips of axons, white lines demarcate axon shafts, curved arrows areas of MT curling;  
1085 scale bar in A represents 20  $\mu$ m in A-D and 10  $\mu$ m in G,H. **E,F,I,J)** Quantifications of axon length  
1086 (E,I) and MT curling (measured in MDI; F,J), both normalised to wild-type controls (red dashed line);  
1087 numbers of neurons analysed are indicated in orange, mean  $\pm$  SEM in blue and results of Mann-  
1088 Whitney rank sum tests are shown in black/grey.

1089

1090 **Fig.S7.** Generation and analysis of *shot* <sup>$\Delta$ PRR</sup>. **A)** Normalised data from quantitative RT-PCR analyses  
1091 of embryos from wild-type and two independent CRISPR/Cas9 mutant lines (*shot* <sup>$\Delta$ PRRa</sup>, *shot* <sup>$\Delta$ PRRb</sup>)  
1092 using probes against different exons (red lines) encoding different functional domains (indicated  
1093 below graphs); they suggest that the PRR is deleted in the mutant strains, but that both versions of  
1094 the allele cause severe expression changes of other exons suggestive of splice aberrations. **B)** A  
1095 list of different splice variants of *shot* (modified from Voelzmann et al., 2017): names provided on the  
1096 left and right, colour-coded as in Fig.1A and sorted by their A\*-,B\*-,C\*- and D\*-type N-termini  
1097 (compare Fig.1A). **C)** Schematic representation of the *shot-RH* genomic sequence from exon 11 to  
1098 14 (position in the *shot* gene indicated by red lines) aligned with sequences from other *Drosophila*  
1099 species (<https://genome.lbl.gov/vista/customAlignment.shtml>; introns in pink, exons in blue); the  
1100 amplitude indicates the degree of evolutionary conservation, thus identifying areas that are not well-  
1101 conserved and therefore suitable deletion sites less likely to affect important splice sites. Black  
1102 arrows indicate the locations of the two guide RNAs for CRISPR/Cas9 incision (slightly removed  
1103 from the 5' end, and at the very 3' end of exon 12), black bars the location of PCR-amplified flanking  
1104 regions (covering part of intron 10/11 up to the end of intron 11/12; start of intron 12/13 to the start  
1105 of exon 14) cloned into 5' and 3' multiple cloning sites (MCS) of *pHD-DsRed-attP* (D; vector scheme  
1106 adapted from Gratz et al., 2014) using EcoRI/NotI and BglII/PstI restriction sites (for details see  
1107 methods).



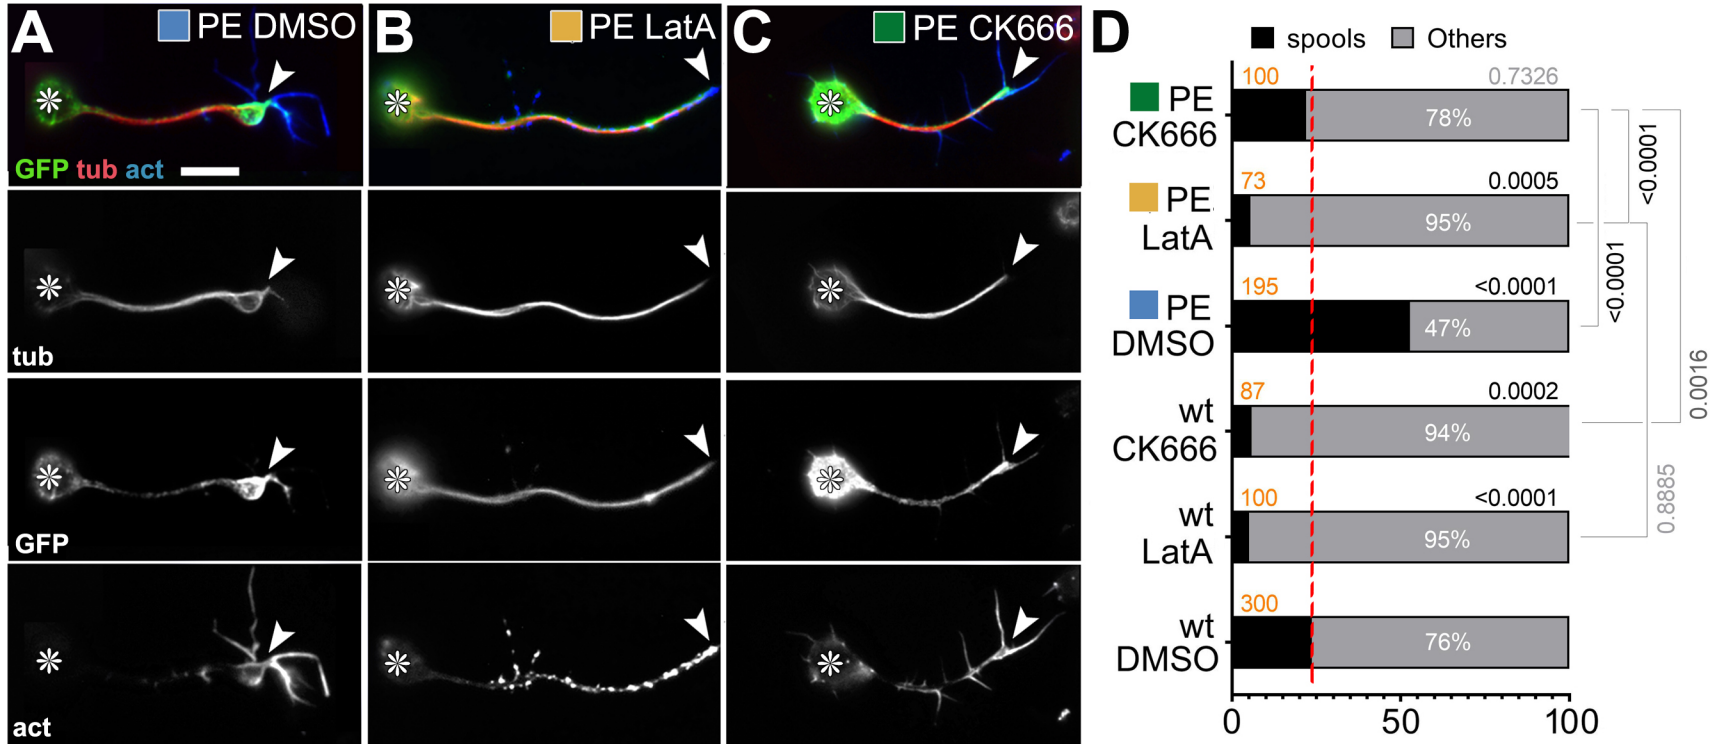

**Fig. 2** Qu et al.

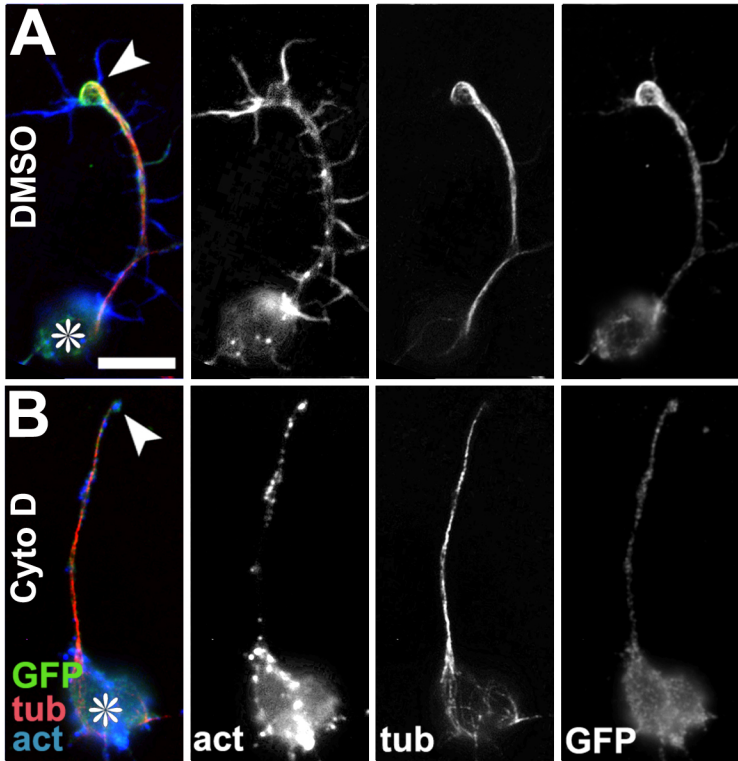

Fig. S1 Qu et al.

**A**

DGXXLXXL

```

          *.***** * *.** *.** .: :. :. * * * * * : * * * * * : * * * * * : * * * * *
Shot CH1 -----DERDAIQKKTFTKWVNVKH-LKKANRRRVVDFEDLRDGHNLLSLLEVLVSGEHL- 51
hACTN1 -----KQQRKFTTAWCNSH-LRKAGTQIENIEEDRFDGLKMLLLEVISGERL- 47
Shot CH2 ISDIVVGKEDNVSAREALLRWARRSTARYPGVRVNDFTSSWRDGLAFSALVHRNRPDLLD 60
          . * : : : * . . * * . : : : : . . * * * : * . : * *

          * : * * * . * : . . : * * * : * : * * . * * * * * * * * * * * * * * * * * * * * *
Shot CH1 ---P-REKGKMRFHMLQNAQMALDFLRYKKIKLVNIRAEDIVDGNPKLT---LGLIWTTII 104
hACTN1 ---AKPERGKMRVHKISNVNKALDFIASKGVKLVSIGAEIIVDGNVKMT---LGMWTTII 101
Shot CH2 WRKARNDRPRERLE-----TAFHIV-EKEYGVTLLDPEDVDTNEPDEKSLITYISSLY 113
          * : * * : * . . * . : : : . * : . : * * * * * : * * :

* : *
Shot CH1 LHFQ-- 108
hACTN1 LRFA-- 105
Shot CH2 DVFPEP 119
          *

```

**B**

DGXXLXXL

```

ShotCH1+2 QKKTFTKWVNVKHLKKANRRRVVDFEDLRDGHNLLSLLEVLVSGEHLPR-EKGKMRFHMLQN 59
hACTN1 QRKFTTAWCNSHLRKAGTQIENIEEDRFDGLKMLLLEVISGERLAKPERGKMRVHKISN 60
          * : * * * * * * * * * * * . :. :. :. * * * * * : * : * * * * * * * : * * * * * . : *

ShotCH1+2 AQMALDFLRYKKIKLVNIRAEDIVDGNPKLTLGLIWTTIILHFQISDIVVGKEDNVSAREA 119
hACTN1 VNKALDFIASKGVKLVSIGAEIIVDGNVKMTLGMWTTIILRFAIQDISVE---ETSAREG 117
          . : * * * * * : * : * * . * * * * * * * * * * * * * * * * * * * * * * * * * * * *

          DGXXLXXL
ShotCH1+2 LLRWARRSTARYPGVRVNDFTSSWRDGLAFSALVHRNRPDLLDWRKARNDRPRERLETA 179
hACTN1 LLWCQRKTAPYKVNVIQNFHISWQDGLGFCALVHRHREPIDYGLKRKDDPLTNLNTAF 177
          * * * . : * * * * * . * . : : * * * * * * * * * * * * * * * * * * * * * * * * * * * *

ShotCH1+2 HIVEKEYGVTLLDPEDV-DTNEPDEKSLITYISSLYDVF 218
hACTN1 DVAEKYLDIPKMLDAEDIVGTARPDEKAIMTYVSSFYHAF 217
          . : * * * . : : * * * * * : * . * * * * : : * * * * * * * * * *

```

Fig. S2 Qu et al.

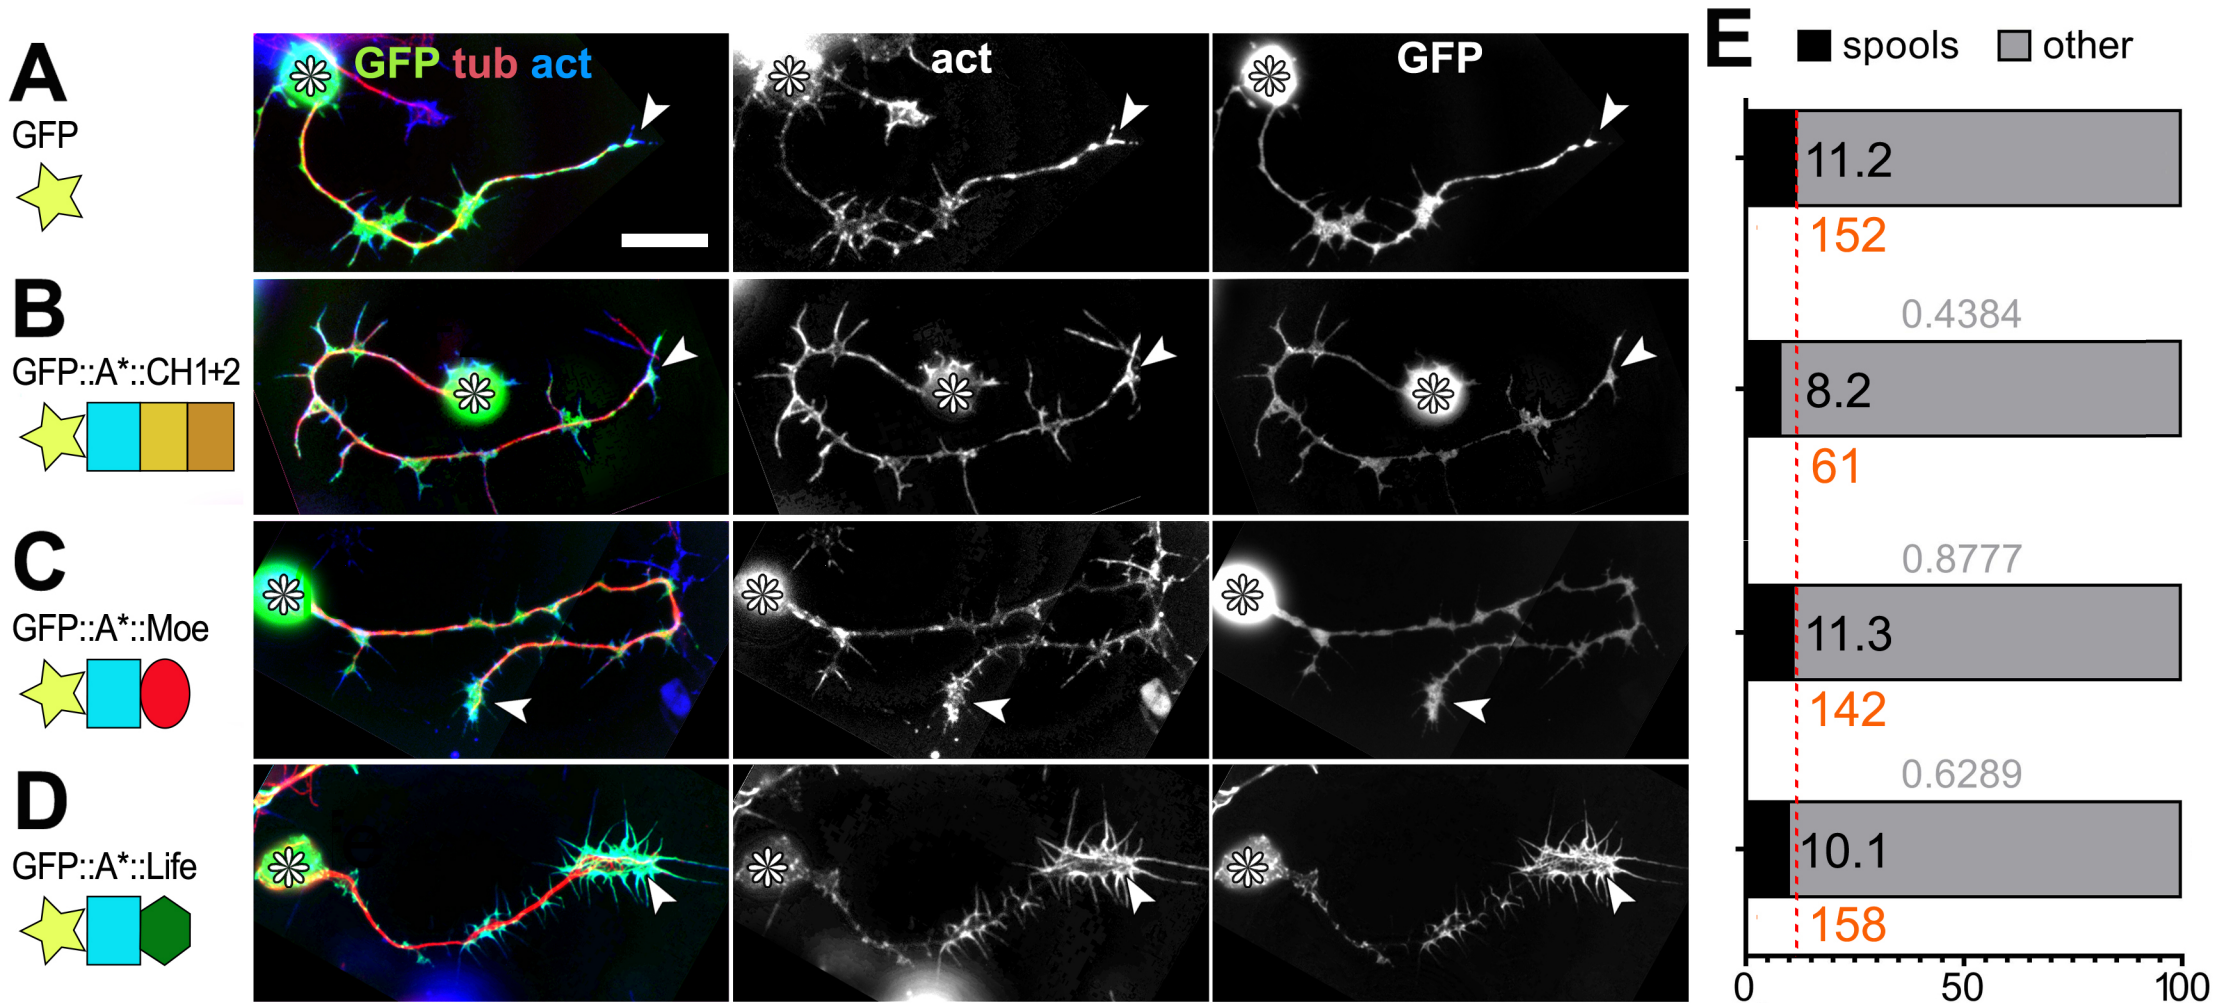

**Fig. S3** Qu et al.

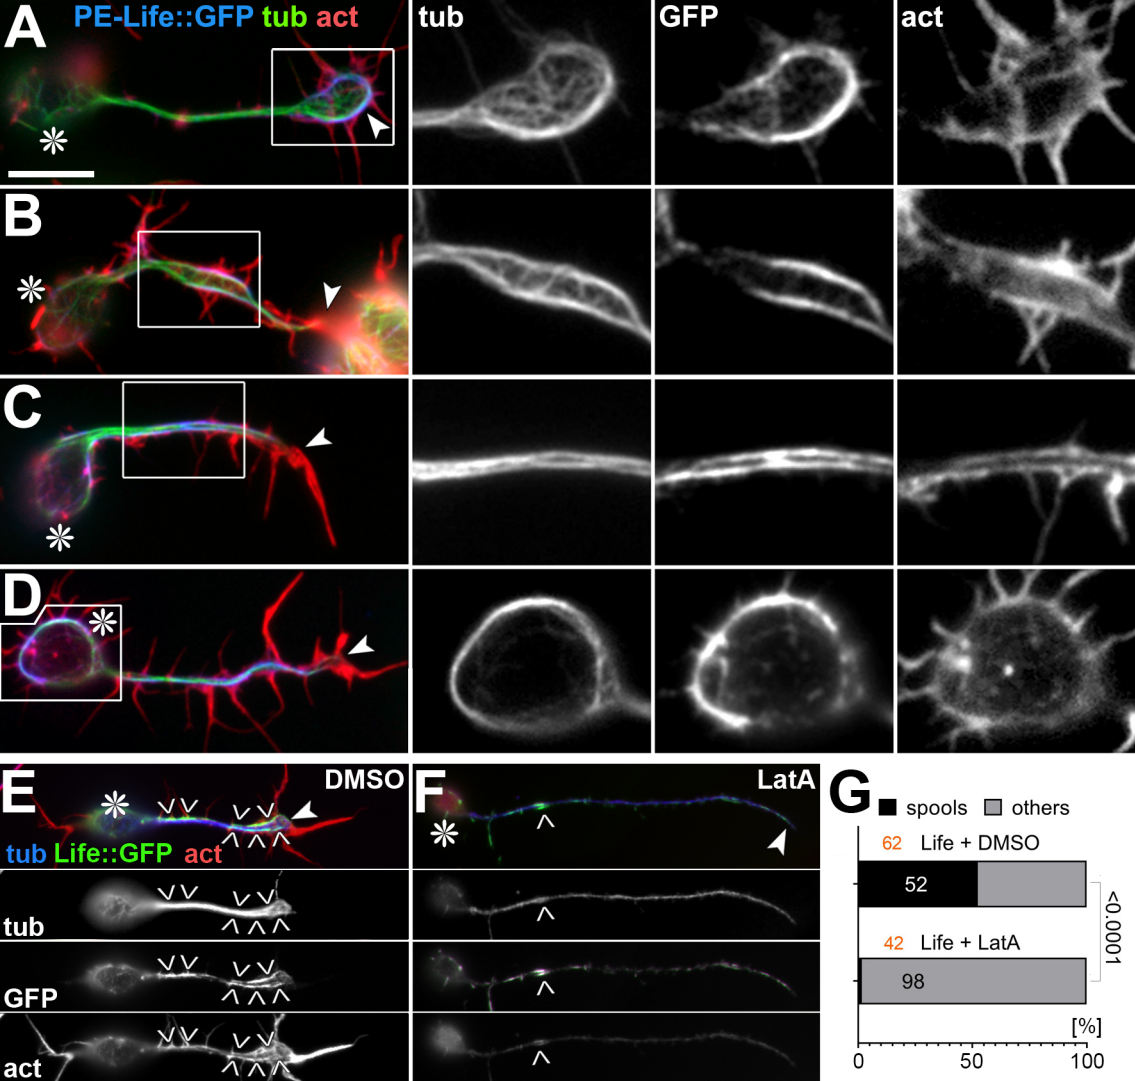

**Fig. 3** Qu et al.



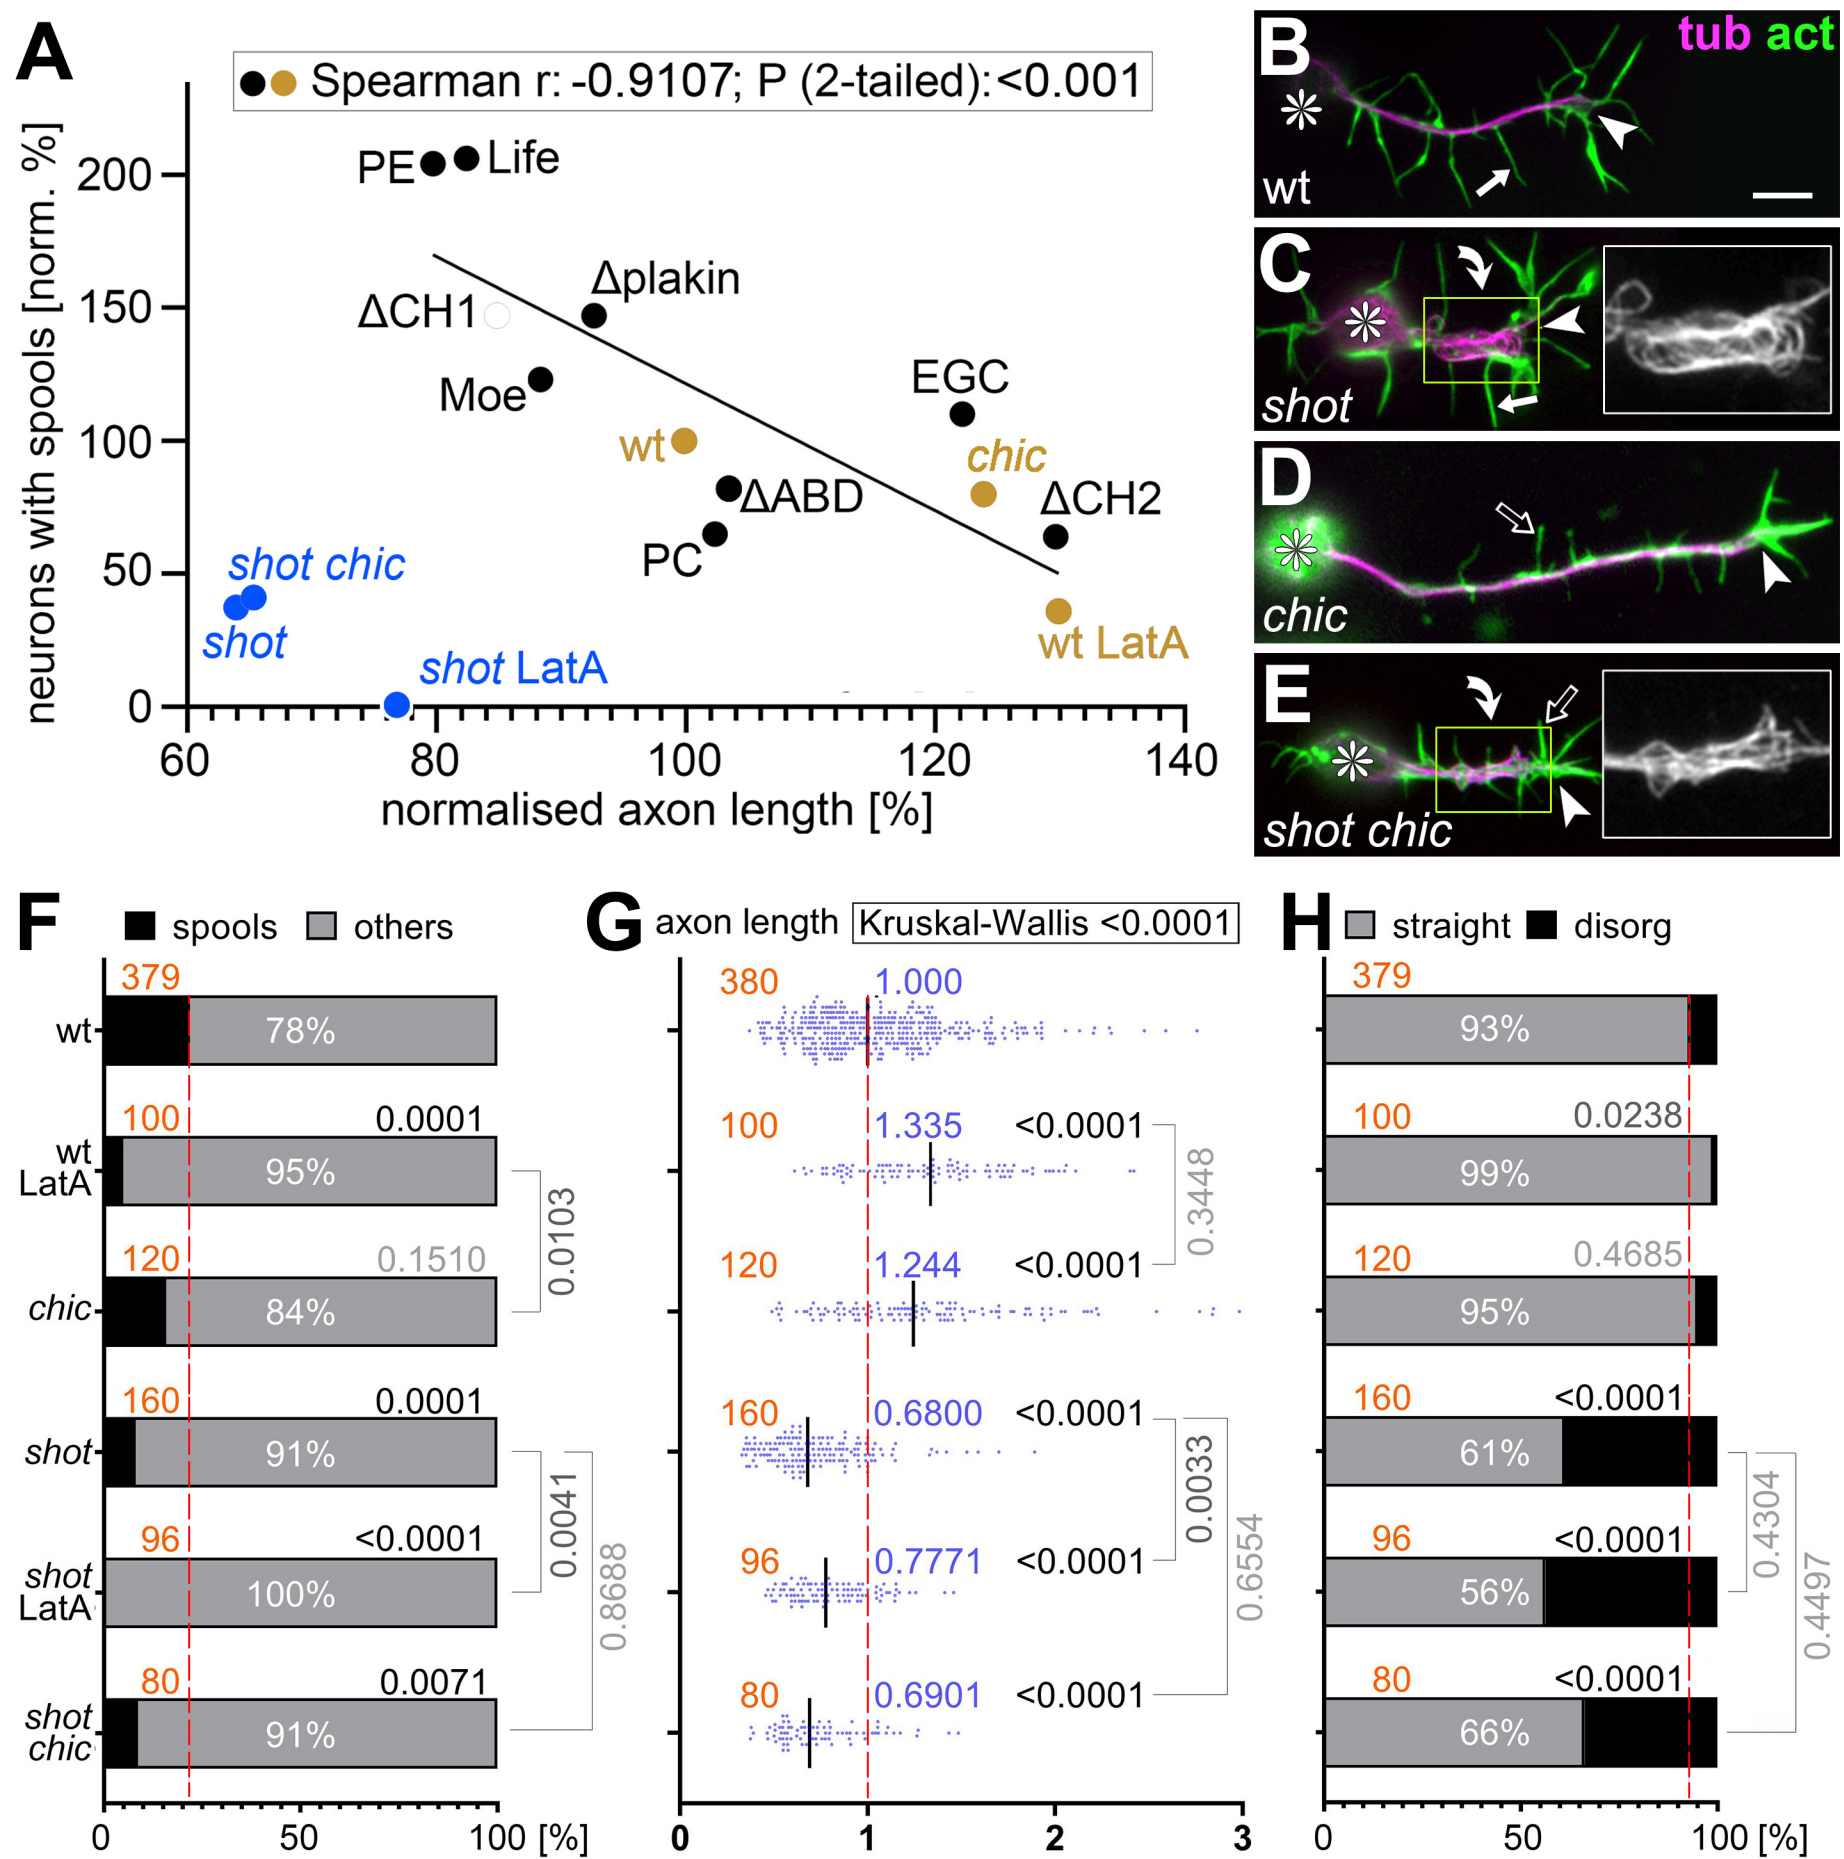

**Fig. 4** Qu et al.

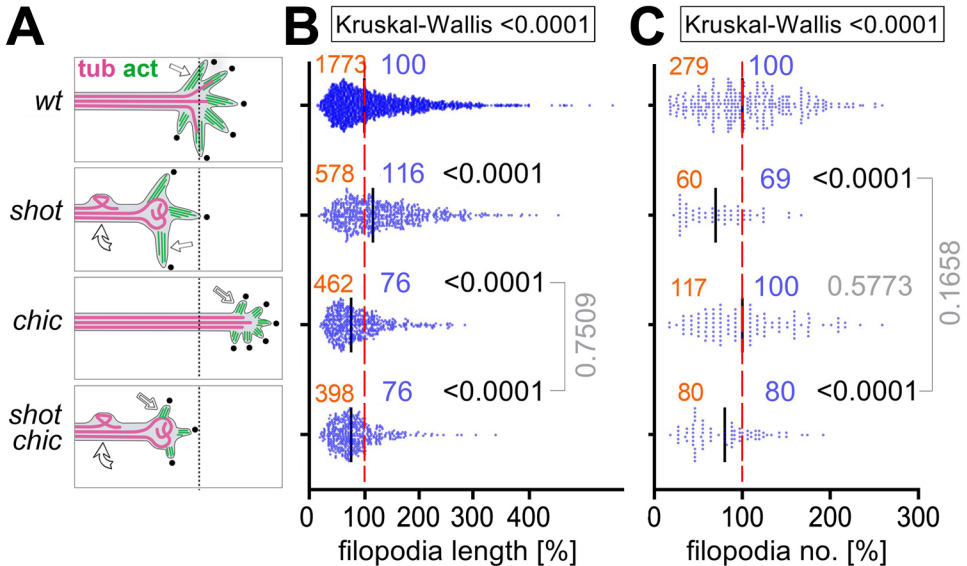

**Fig. S5** Qu et al.

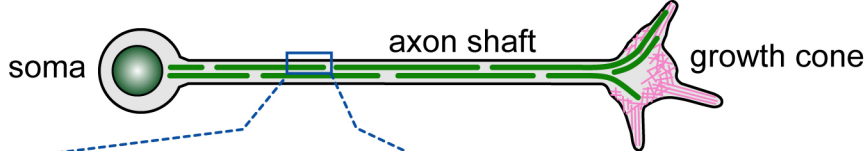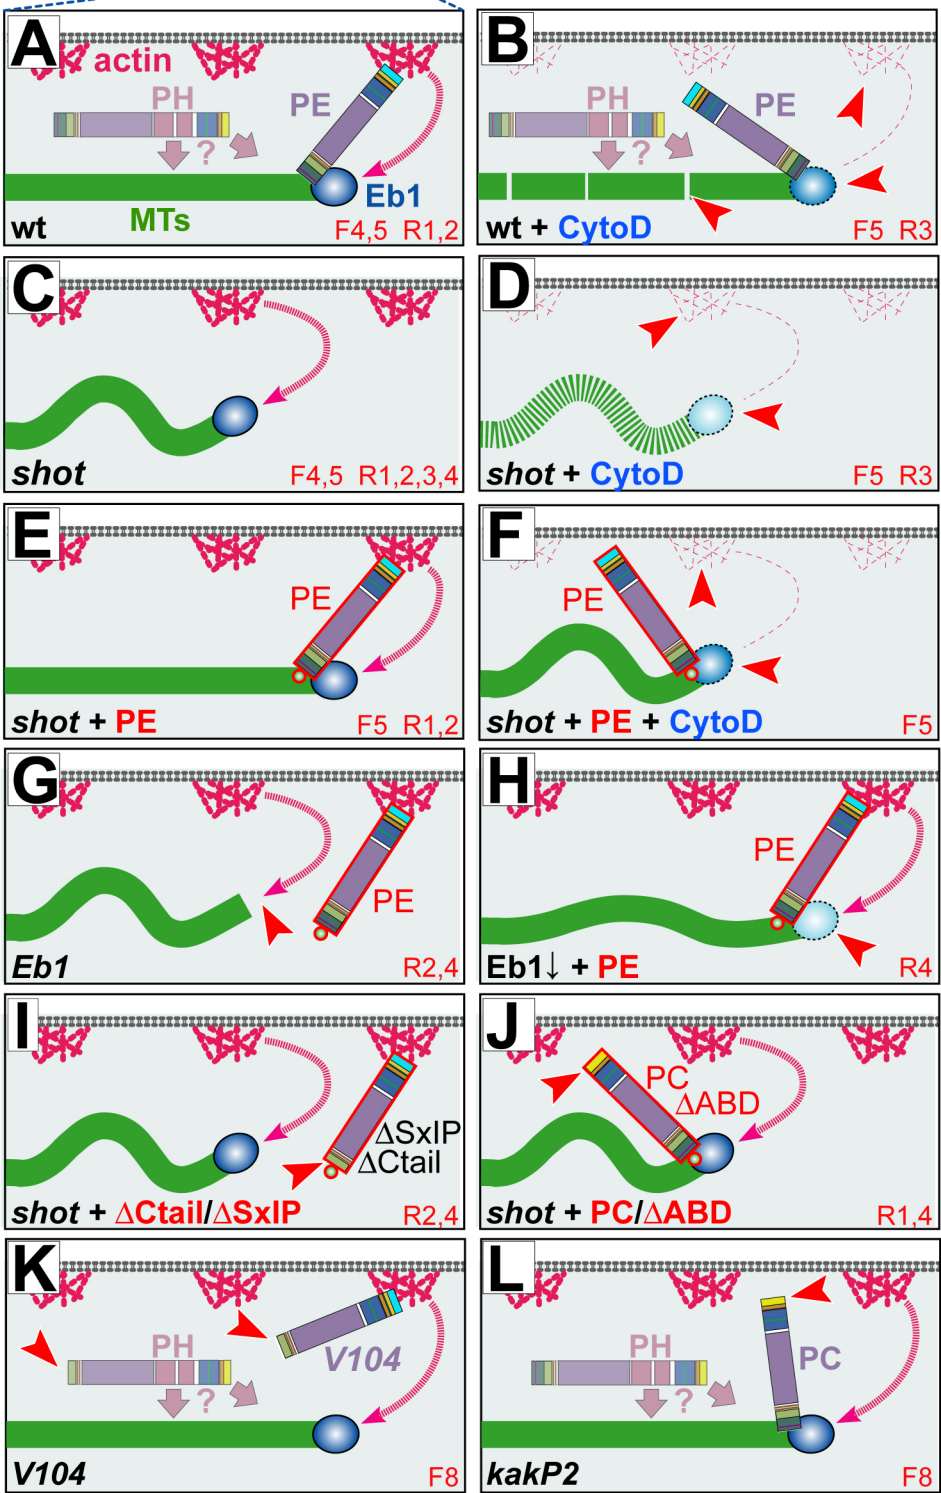

Fig. 5 Qu et al.

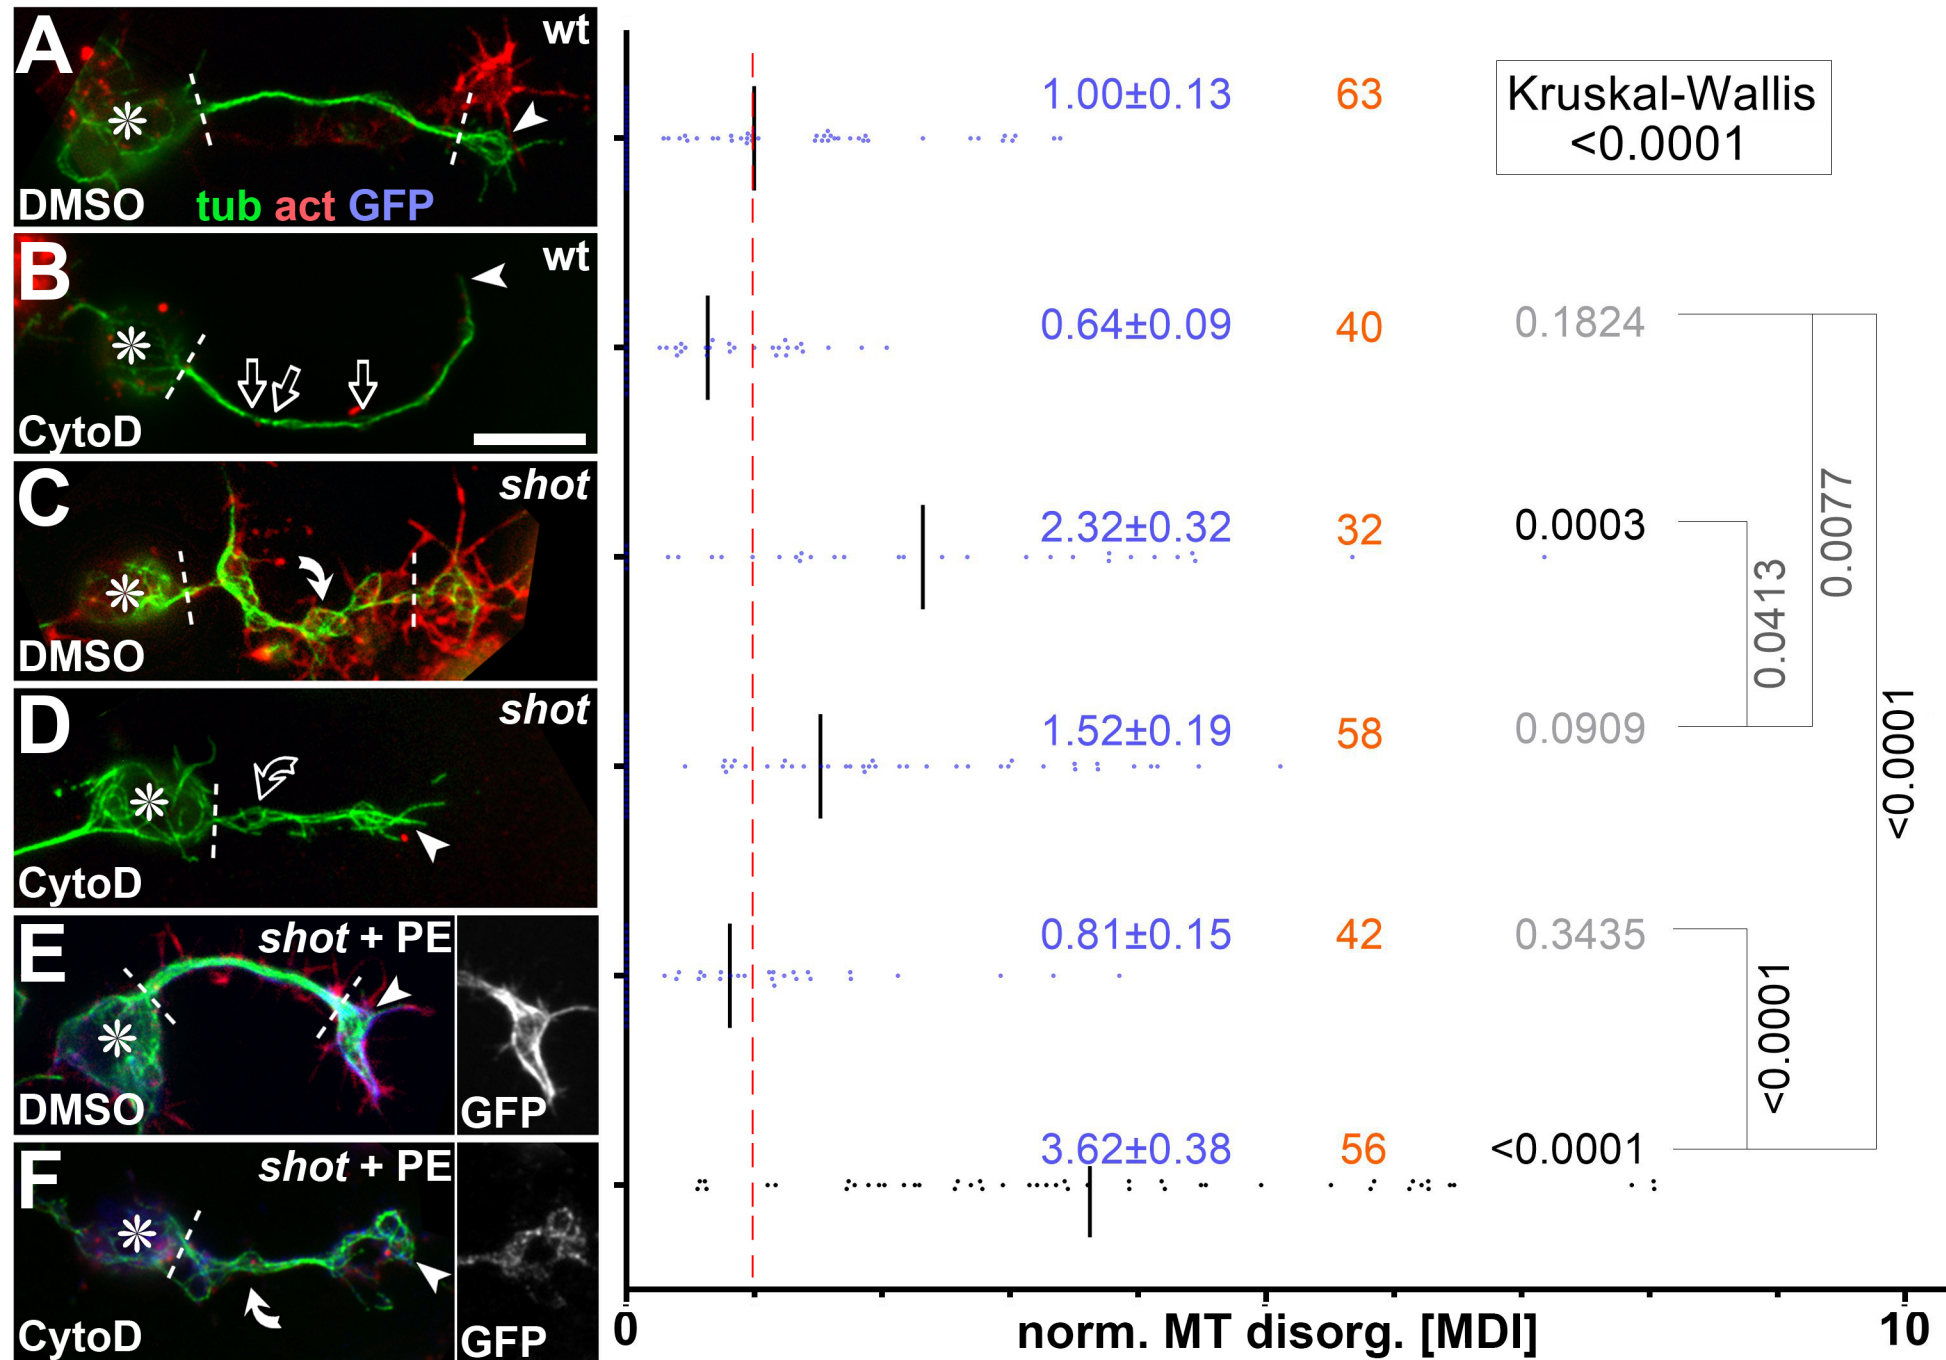

**Fig. 6** Qu et al.

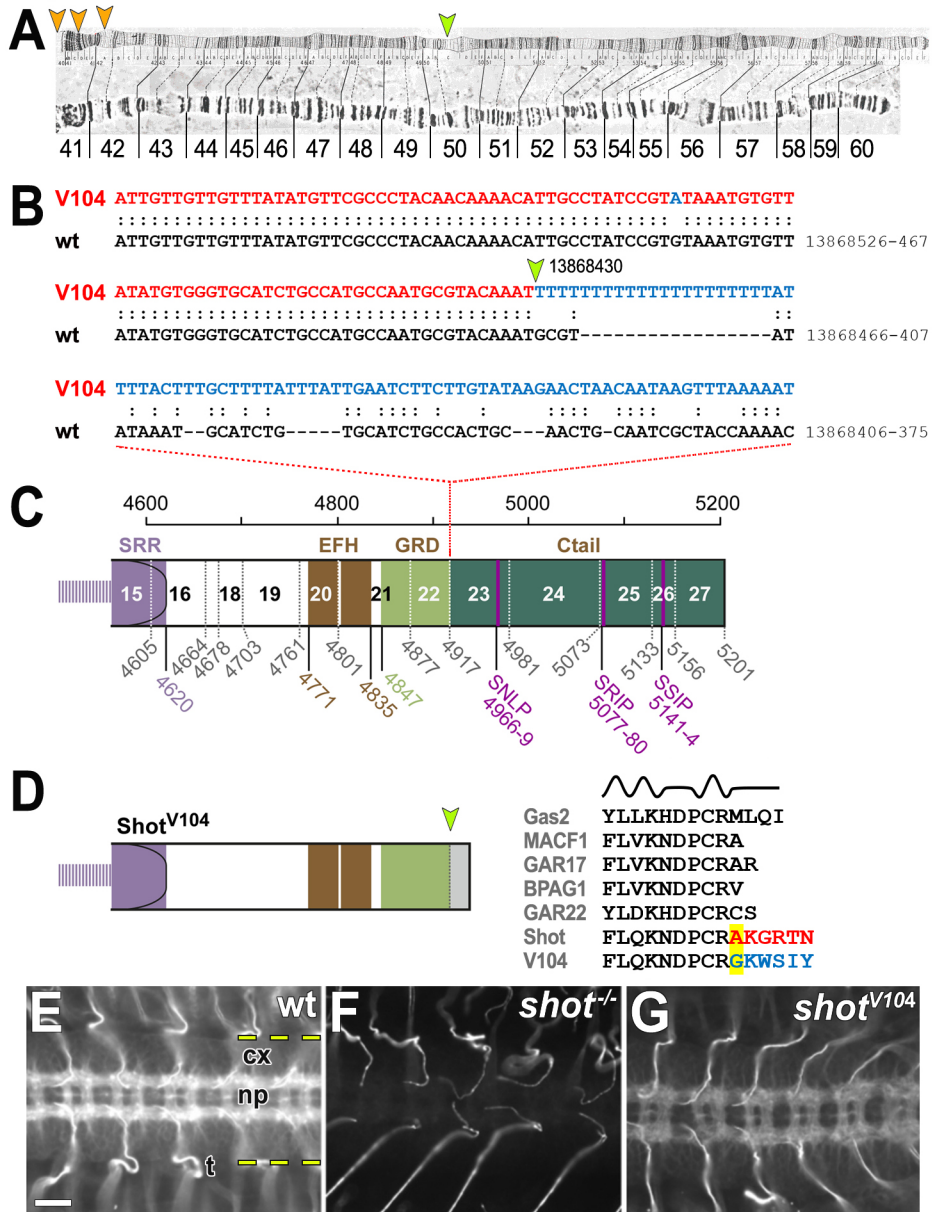

Fig. 7 Qu et al.

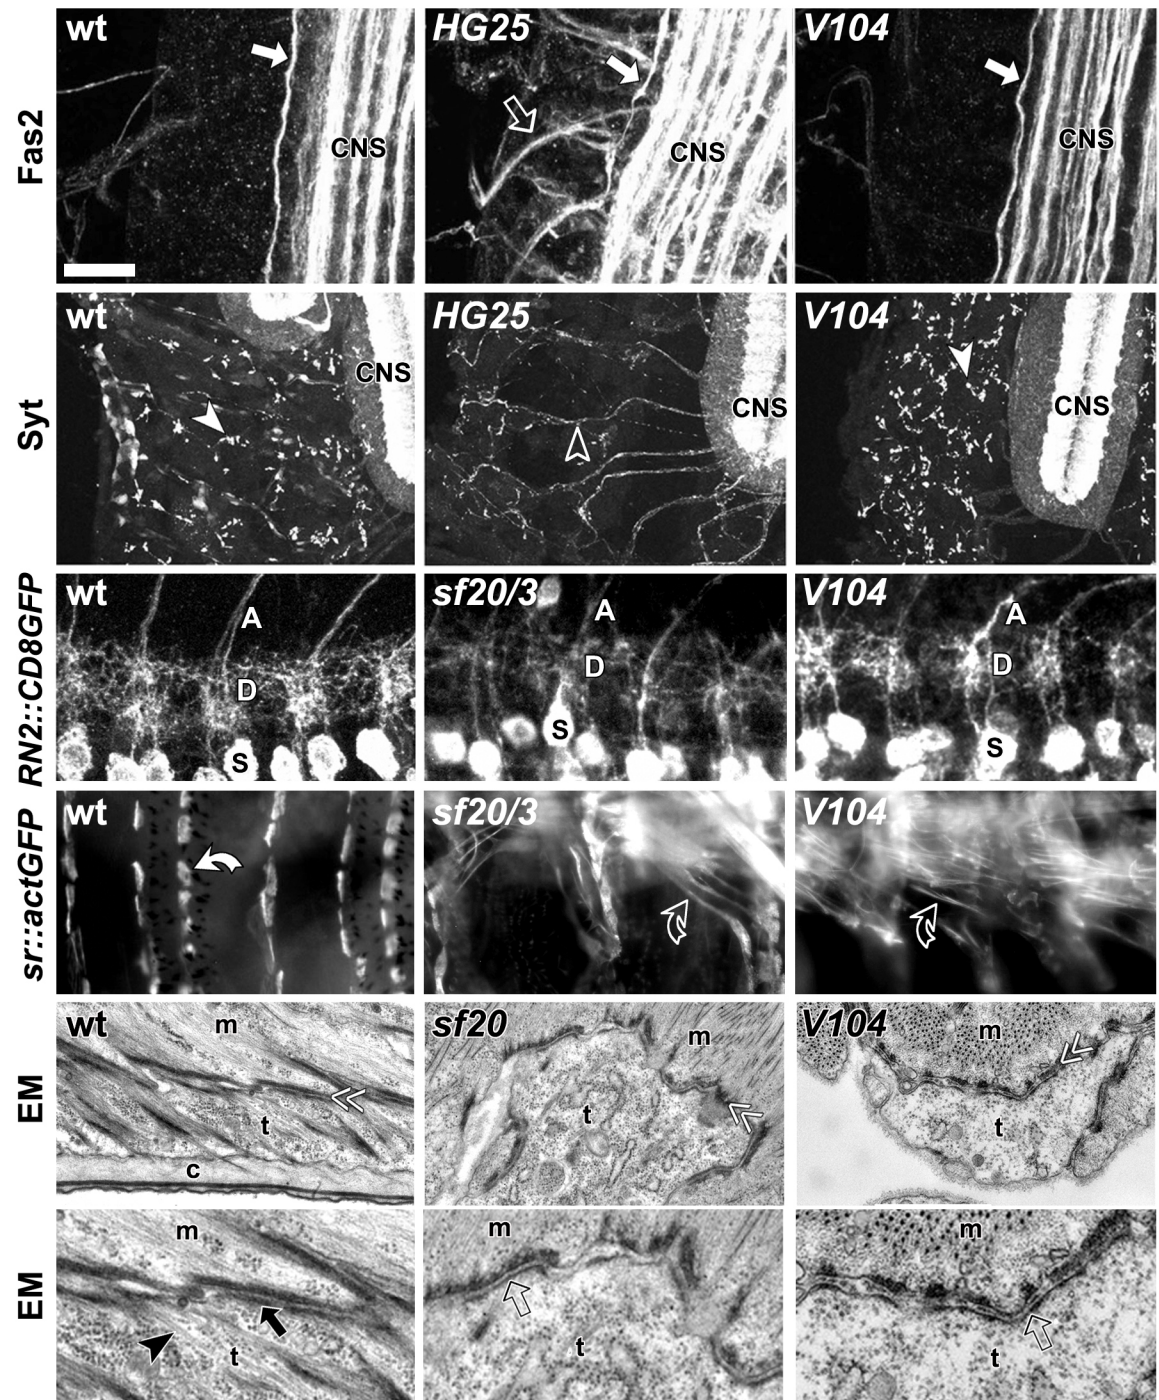

**Fig. S6** Qu et al.

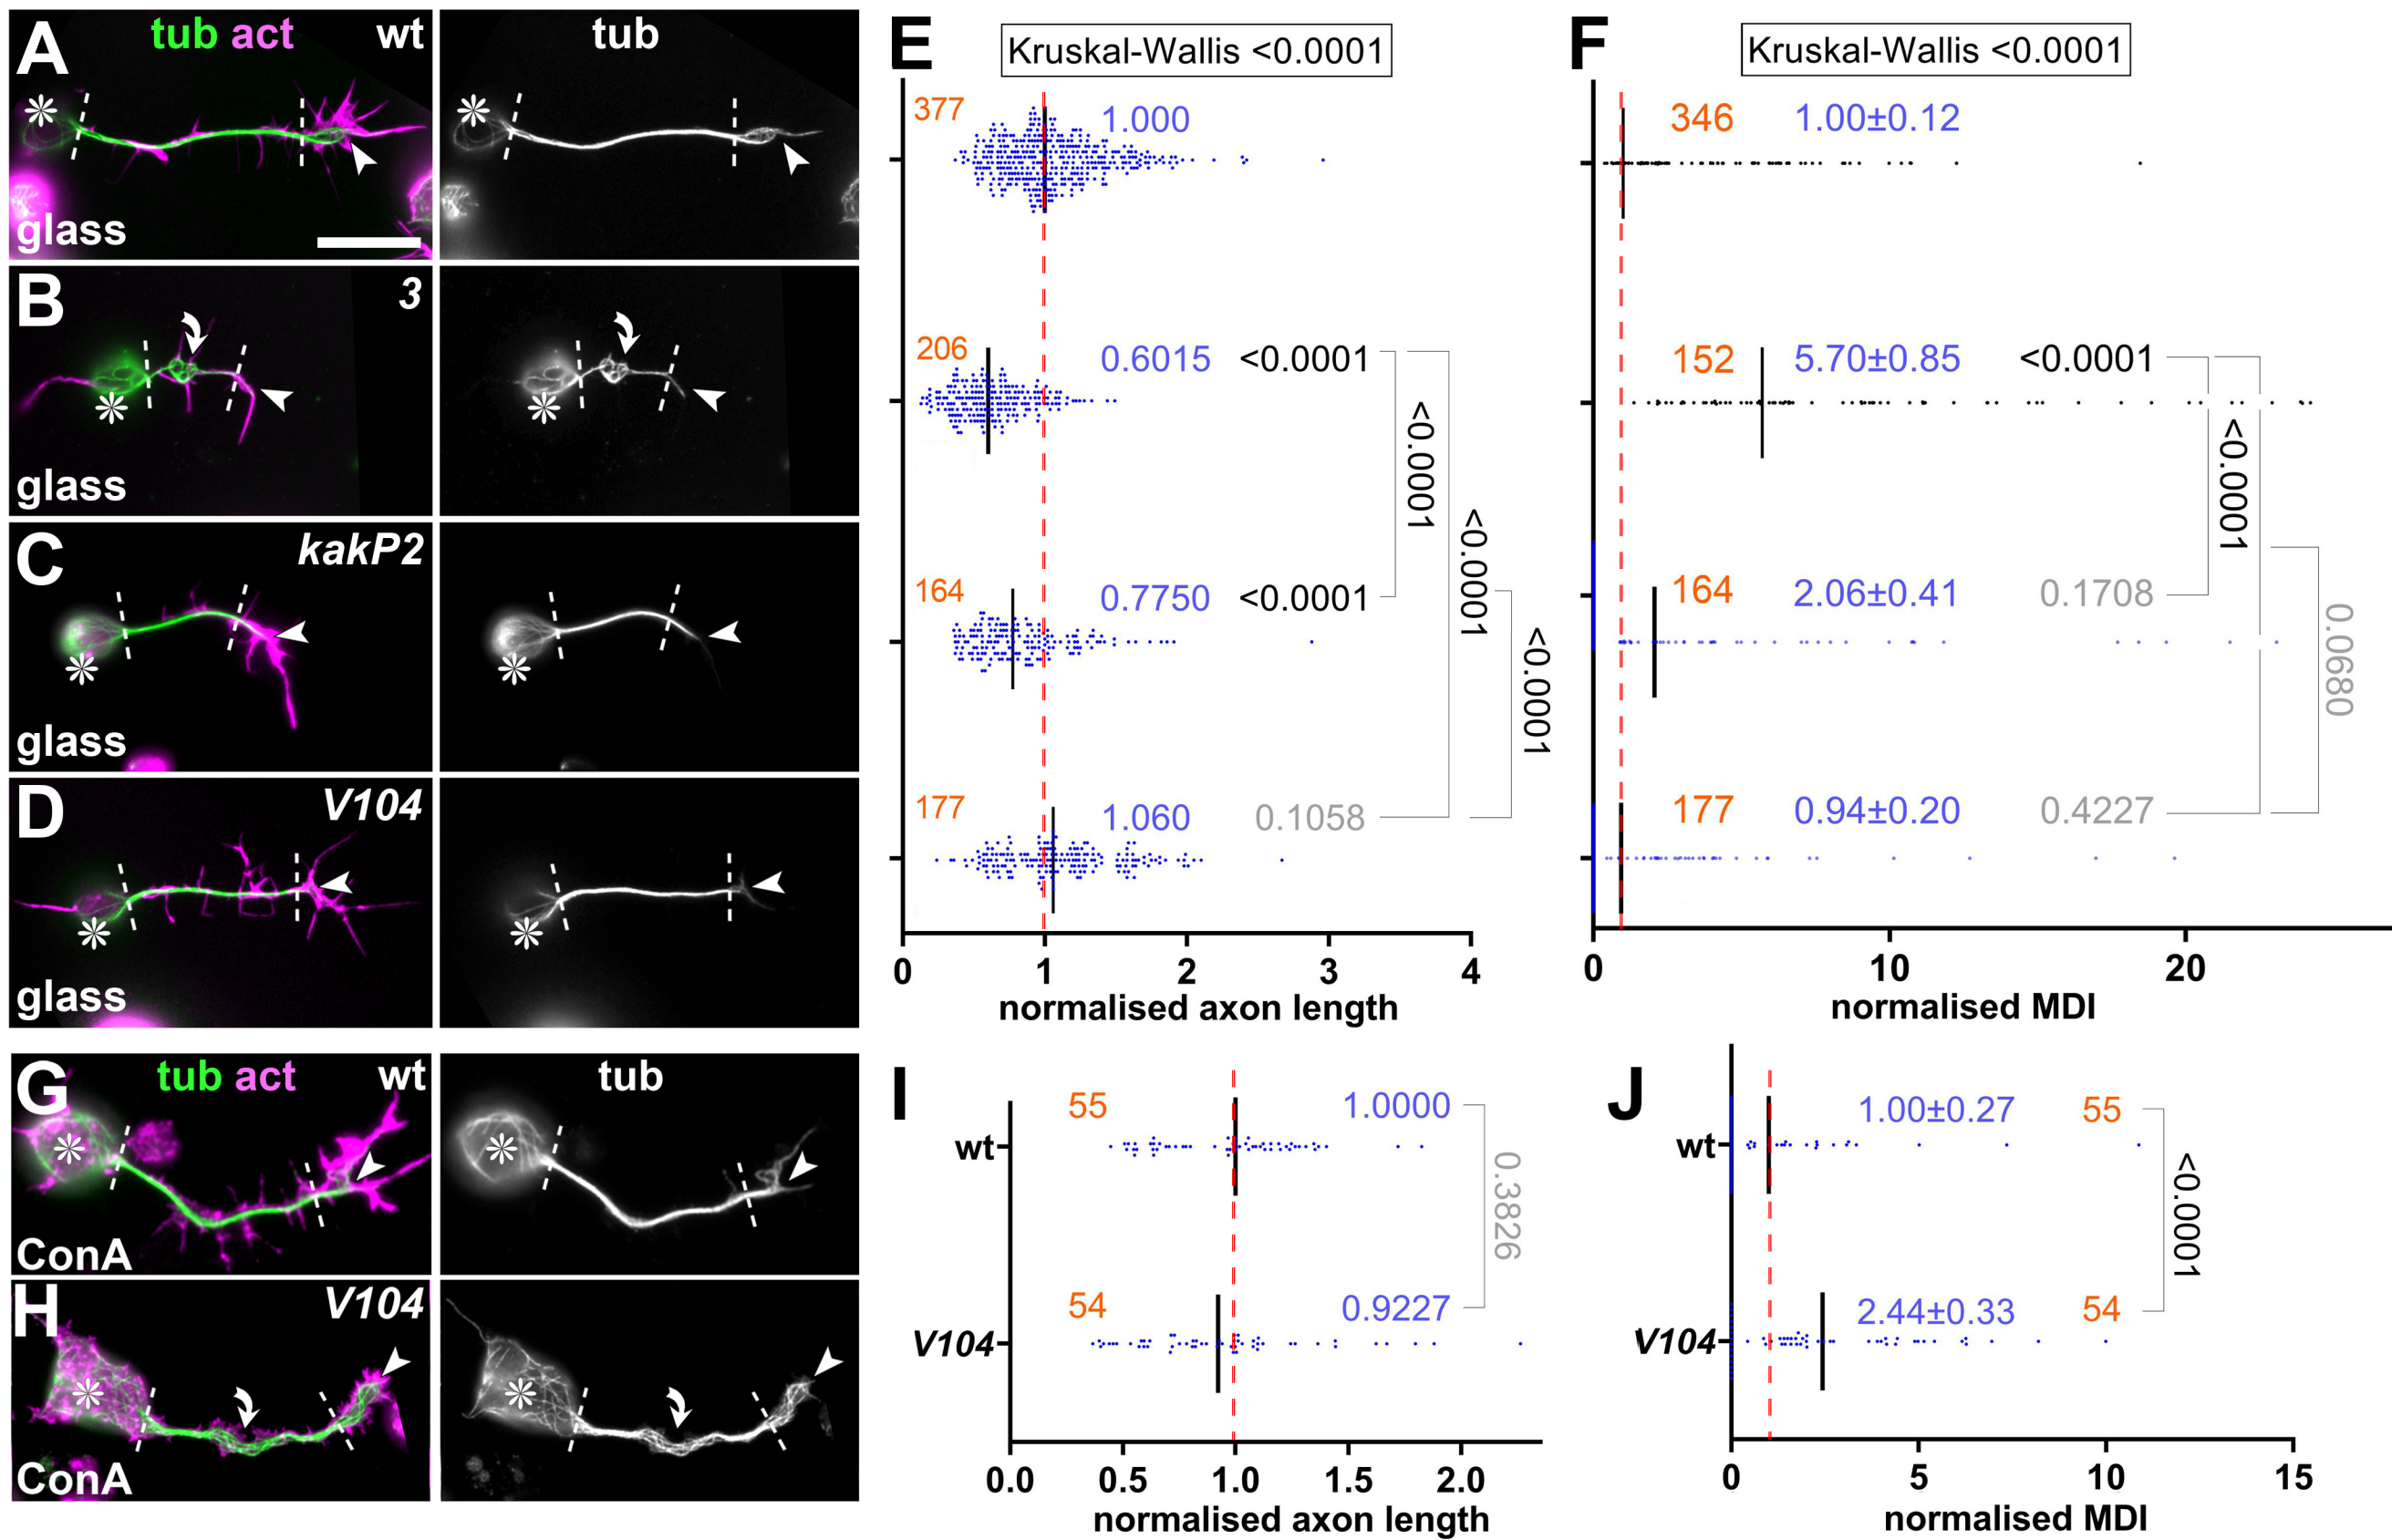

Fig. 8 Qu et al.

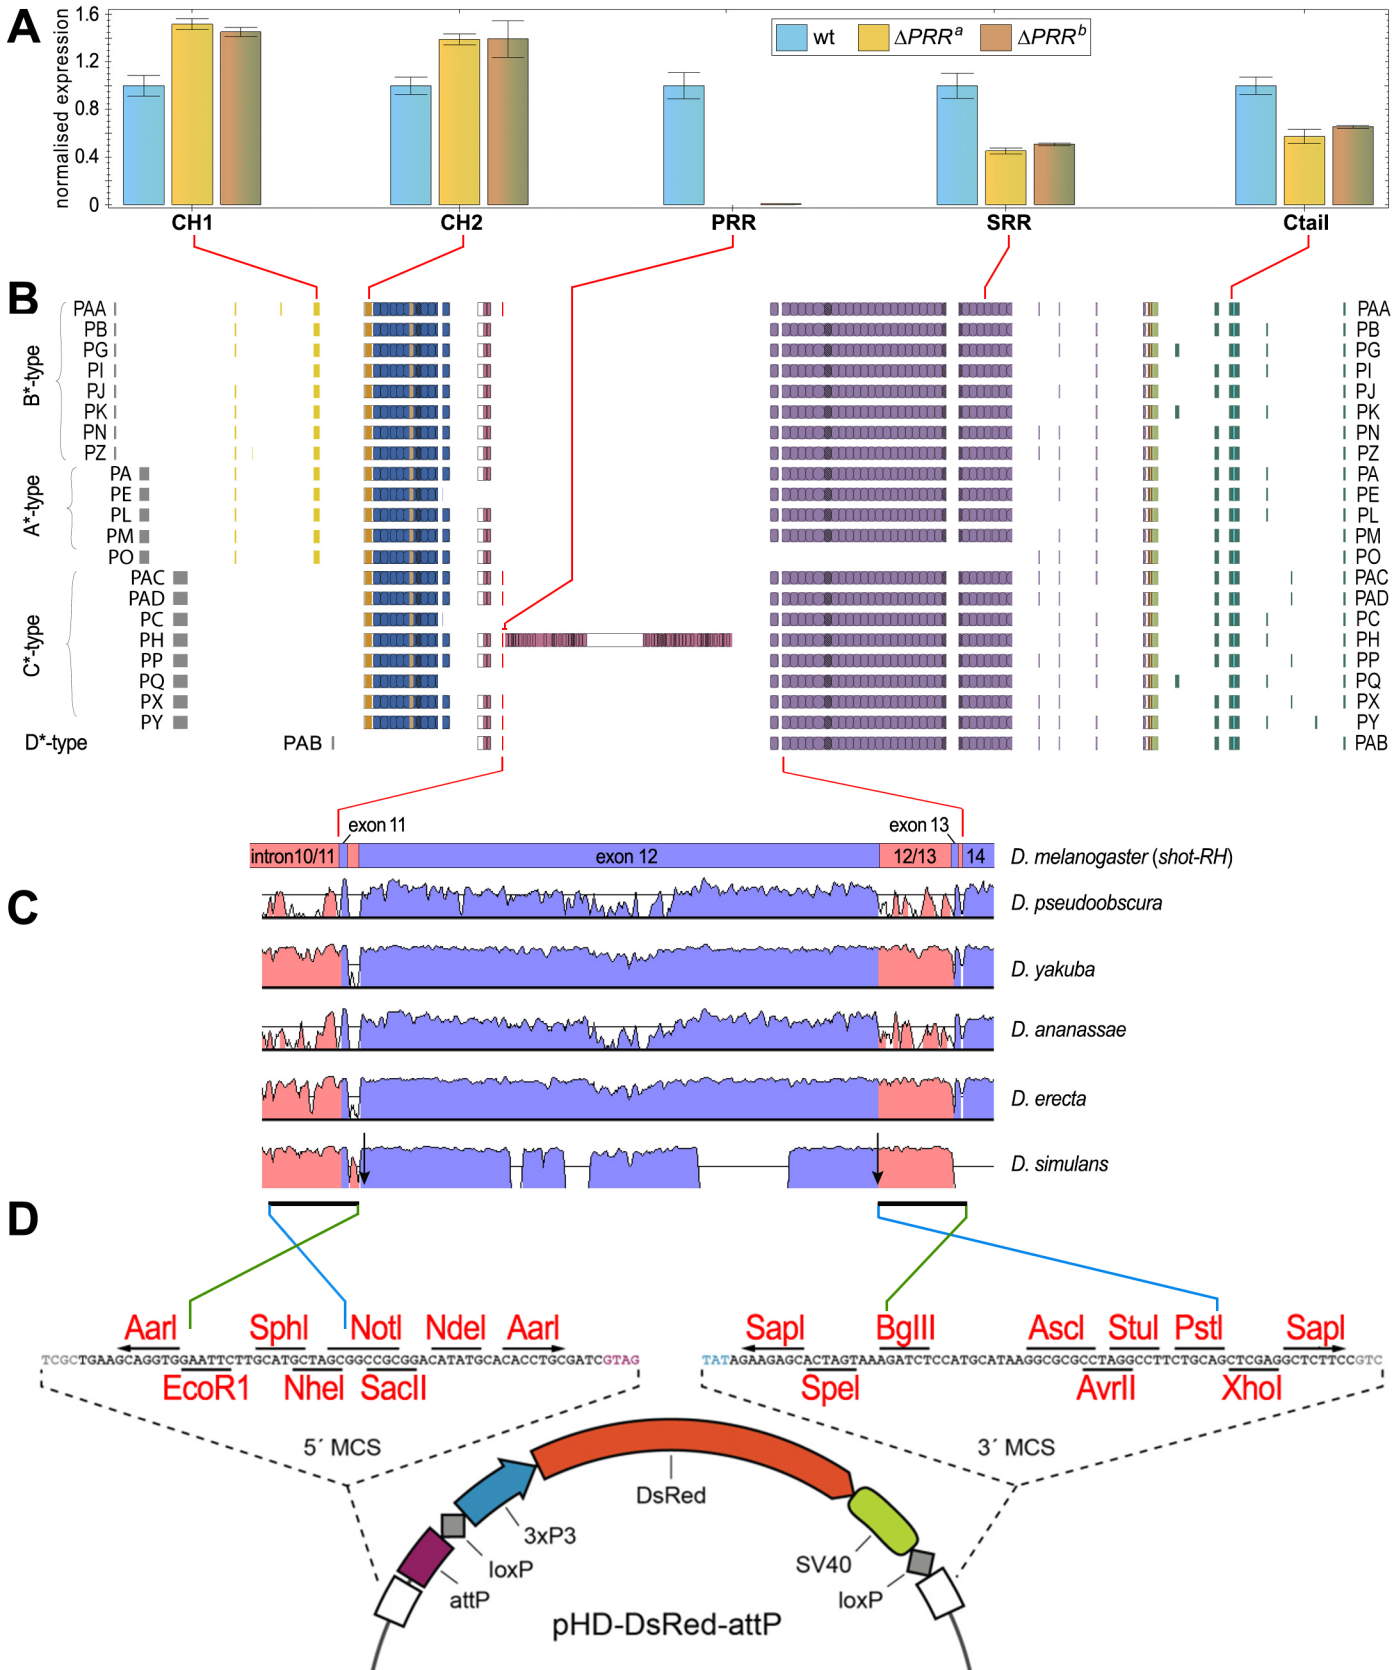

Fig. S7 Qu et al.
